# Supplementary material for: Shooting short-wavelength nonlinear optical materials with targeted balance performances in hydroxyborates through first-principles high-throughput screening
Source: Royal Society of Chemistry journal article supplement (doi:10.1039/d4qi02234c), 2024-01-01
Supplement: d4qi02234c1.pdf [file d4qi02234c1.pdf]

## *Electronic Supplementary Information for*

# Shooting short-wavelength nonlinear optical materials with targeted balance performances in hydroxyborates through first-principles high-throughput screening

Chenxu Li,<sup>‡a,b,c</sup> Abudukadi Tudi,<sup>‡a,b</sup> Huanhuan Cheng,<sup>a,b</sup> Qingyu Liu,<sup>a,b</sup> Zhihua Yang<sup>\*a,b</sup> and Shilie Pan <sup>\*a,b</sup>

<sup>a</sup>Research Center for Crystal Materials; State Key Laboratory of Functional Materials and Devices for Special Environmental Conditions; Xinjiang Key Laboratory of Functional Crystal Materials; Xinjiang Technical Institute of Physics and Chemistry, Chinese Academy of Sciences, 40-1 South Beijing Road, Urumqi 830011, China.

E-mails: slpan@ms.xjb.ac.cn (S. Pan), zhyang@ms.xjb.ac.cn (Z. Yang)

<sup>b</sup>Center of Materials Science and Optoelectronics Engineering, University of Chinese Academy of Sciences, Beijing 100049, China.

<sup>c</sup>School of Medical Engineering and Technology, Xinjiang Medical University, Urumqi 830011, China.

<sup>‡</sup> These authors contributed equally to this work.

## Contents

**Table S1** The ICSD code, crystal system, space group, and chemical formula of 222 hydroxyborates crystals with non-centrosymmetric (NCS) structures collected from ICSD.

**Table S2** The basic information of hydroxyborates with 0D isolated B-O/OH clusters.

**Table S3** The basic information of hydroxyborates with 1D infinite B-O/OH chains.

**Table S4** The basic information of hydroxyborates with 2D B-O/OH layered configurations.

**Table S5** The basic information of hydroxyborates with 3D B-O/OH frameworks.

**Table S6** The ICSD collection numbers, chemical formula, space group, GGA and HSE06 band gaps, second harmonic generation (SHG) coefficients, and birefringence  $\Delta n$  at 1064 nm of 60 screening hydroxyborates crystals. Note that SHG coefficients, and birefringence  $\Delta n$  have been corrected with scissors operators.

**Table S7** Calculated band gaps ( $E_g$ ) by hybrid HSE06, the maximum SHG coefficients ( $d_{ij}$ ), birefringence at 1064 nm ( $\Delta n$ ), UV cutoff wavelengths ( $\lambda_{\text{cutoff}}$ ), shortest phase-matching wavelengths ( $\lambda_{\text{PM}}$ ), dimensionality of B-O/OH anionic framework, and  $(A + \text{OH})/B$  ratio of screened hydroxyborate crystals.

**Table S8** Calculated band gaps ( $E_g$ ) by hybrid HSE06, the maximum SHG coefficients ( $d_{ij}$ ), birefringence at 1064 nm ( $\Delta n$ ), UV cutoff wavelengths ( $\lambda_{\text{cutoff}}$ ), shortest phase-matching wavelengths ( $\lambda_{\text{PM}}$ ), dimensionality of B-O/OH anionic framework, and  $(A + \text{OH})/B$  ratio of screened hydroxyborate crystals.

**Table S9** The investigation of ratio  $(A + \text{OH})/B = 0.636$ , dimensionality of B-O/OH anionic framework, birefringence at 1064 nm (cal.), and  $[\text{BO}_3]$  &  $[\text{B}(\text{OH})_3]$  &  $[\text{BO}_2(\text{OH})]$  density among hydroxyborates involving the screened compounds.

**Table S10** Bonding electron difference ( $\Delta\rho$ ) and contribution percent  $w$  (%) of different units in  $\text{KCa}_4(\text{B}_{22}\text{O}_{32}(\text{OH})_{10}\text{Cl})\cdot 4\text{H}_2\text{O}$  calculated by the REDA model.

**Figure S1** (a) Band structures by the HSE06 functional. (b) Total and partial density of states (PDOS) and band-resolved NLO coefficients. (c) SHG-weighted density of occupied and unoccupied states in virtual-electron (VE) progress of  $\text{KCa}_4(\text{B}_{22}\text{O}_{32}(\text{OH})_{10}\text{Cl})\cdot 4\text{H}_2\text{O}$ . Here,  $\chi_{122} = 2d_{12}$ .

**Notes and references**

**Table S1** The ICSD code, crystal system, space group, and chemical formula of 222 hydroxyborates crystals with non-centrosymmetric (NCS) structures collected from ICSD.

| ICSD code | Crystal system | Space group | Formula                                                                                                                        |
|-----------|----------------|-------------|--------------------------------------------------------------------------------------------------------------------------------|
| 39637     | Triclinic      | $P1$        | $\text{KCa}_4(\text{B}_{22}\text{O}_{32})(\text{OH})_{10}\text{Cl}\cdot 4\text{H}_2\text{O}$                                   |
| 187776    | Triclinic      | $P1$        | $\text{KCa}_4(\text{B}_{22}\text{O}_{32}(\text{OH})_{10}\text{Cl})\cdot 4\text{H}_2\text{O}$                                   |
| 172480    | Triclinic      | $P1$        | $\text{Bi}(\text{B}_4\text{O}_6(\text{OH})_2)(\text{OH})$                                                                      |
| 76888     | Triclinic      | $P1$        | $\text{Ca}_9\text{B}_{26}\text{O}_{34}(\text{OH})_{24}\text{Cl}_4\cdot 13\text{H}_2\text{O}$                                   |
| 172482    | Triclinic      | $P1$        | $\text{Bi}_3(\text{B}_6\text{O}_{13}(\text{OH}))$                                                                              |
| 174161    | Triclinic      | $P1$        | $\text{Ba}_3\text{Na}(\text{OH})(\text{B}_9\text{O}_{16})(\text{B}(\text{OH})_4)$                                              |
| 182942    | Triclinic      | $P1$        | $\text{Tl}((\text{UO}_2)(\text{B}_5\text{O}_8)(\text{OH})\text{F})$                                                            |
| 261299    | Triclinic      | $P1$        | $(\text{NH}_4)_8(\text{Co}_2\text{B}_4\text{P}_8\text{O}_{30}(\text{OH})_4)$                                                   |
| 409327    | Triclinic      | $P1$        | $\text{Mg}_2(\text{BP}_2\text{O}_7(\text{OH})_3)$                                                                              |
| 420549    | Triclinic      | $P1$        | $\text{Ca}_2(\text{B}_5\text{O}_8(\text{OH}))_2\text{B}(\text{OH})_3\cdot \text{H}_2\text{O}$                                  |
| 134988    | Triclinic      | $P1$        | $\text{Ca}_2(\text{B}_5\text{O}_8(\text{OH}))_2(\text{B}(\text{OH})_3)\cdot \text{H}_2\text{O}$                                |
| 137621    | Triclinic      | $P1$        | $\text{Na}_{0.711}(\text{Al}_{1.315}\text{Fe}_{1.685})\text{Al}_6(\text{BO}_3)_3\text{Si}_6\text{O}_{18}\text{O}(\text{OH})_3$ |
| 137622    | Triclinic      | $P1$        | $\text{Na}_{0.889}(\text{Al}_{2.078}\text{Fe}_{0.922})\text{Al}_6(\text{BO}_3)_3\text{Si}_6\text{O}_{18}\text{O}(\text{OH})_3$ |
| 42570     | Triclinic      | $P1$        | $\text{Ba}_2\text{B}_{13}\text{O}_{19}(\text{OH})_5\cdot 5\text{H}_2\text{O}$                                                  |
| 91539     | Monoclinic     | $P2$        | $\text{Ba}_5(\text{B}_{20}\text{O}_{33}(\text{OH})_4)\cdot \text{H}_2\text{O}$                                                 |
| 28426     | Monoclinic     | $P2_1$      | $\text{CaB}_3\text{O}_4(\text{OH})_3\cdot \text{H}_2\text{O}$                                                                  |
| 28427     | Monoclinic     | $P2_1$      | $\text{Ca}(\text{B}_3\text{O}_4(\text{OH})_3)\cdot \text{H}_2\text{O}$                                                         |
| 171019    | Monoclinic     | $P2_1$      | $\text{CaB}_8\text{O}_{11}(\text{OH})_4$                                                                                       |
| 250323    | Monoclinic     | $P2_1$      | $\text{Ca}(\text{B}_8\text{O}_{11}(\text{OH})_4)$                                                                              |
| 256908    | Monoclinic     | $P2_1$      | $\text{Ba}_3(\text{B}_6\text{O}_{10}(\text{OH})_2)(\text{CO}_3)$                                                               |
| 262502    | Monoclinic     | $P2_1$      | $\text{Ba}_2(\text{B}_6\text{O}_9(\text{OH})_4)$                                                                               |
| 263504    | Monoclinic     | $P2_1$      | $\text{CaB}_3\text{O}_4(\text{OH})_3\cdot \text{H}_2\text{O}$                                                                  |
| 263505    | Monoclinic     | $P2_1$      | $\text{CaB}_3\text{O}_4(\text{OH})_3\cdot \text{H}_2\text{O}$                                                                  |
| 263506    | Monoclinic     | $P2_1$      | $\text{CaB}_3\text{O}_4(\text{OH})_3\cdot \text{H}_2\text{O}$                                                                  |
| 263507    | Monoclinic     | $P2_1$      | $\text{CaB}_3\text{O}_4(\text{OH})_3\cdot \text{H}_2\text{O}$                                                                  |
| 263508    | Monoclinic     | $P2_1$      | $\text{CaB}_3\text{O}_4(\text{OH})_3\cdot \text{H}_2\text{O}$                                                                  |
| 263509    | Monoclinic     | $P2_1$      | $\text{CaB}_3\text{O}_4(\text{OH})_3\cdot \text{H}_2\text{O}$                                                                  |
| 263510    | Monoclinic     | $P2_1$      | $\text{CaB}_3\text{O}_4(\text{OH})_3\cdot \text{H}_2\text{O}$                                                                  |
| 415082    | Monoclinic     | $P2_1$      | $\text{Ca}(\text{B}_8\text{O}_{11}(\text{OH})_4)$                                                                              |
| 432814    | Monoclinic     | $P2_1$      | $\text{Ca}_2(\text{B}_5\text{O}_8(\text{OH}))_2(\text{B}(\text{OH})_3)\cdot \text{H}_2\text{O}$                                |
| 4228      | Monoclinic     | $P2_1$      | $\text{Sr}(\text{B}_8\text{O}_{11}(\text{OH})_4)$                                                                              |
| 20074     | Monoclinic     | $P2_1$      | $\text{Sr}_2(\text{B}_5\text{O}_8(\text{OH}))_2(\text{B}(\text{OH})_3)\cdot \text{H}_2\text{O}$                                |
| 20963     | Monoclinic     | $P2_1$      | $\text{LiNd}(\text{BO}_3(\text{OH}))$                                                                                          |
| 22336     | Monoclinic     | $P2_1$      | $\text{Na}(\text{B}(\text{OH})_2\text{Si}_2\text{O}_5)$                                                                        |
| 28014     | Monoclinic     | $P2_1$      | $\text{Sr}_2(\text{B}_5\text{O}_8(\text{OH}))_2(\text{B}(\text{OH})_3)\cdot \text{H}_2\text{O}$                                |
| 100400    | Monoclinic     | $P2_1$      | $(\text{NH}_4)_2(\text{B}_4\text{O}_5(\text{OH})_4)\cdot 2\text{H}_2\text{O}$                                                  |
| 237586    | Monoclinic     | $P2_1$      | $\text{Eu}(\text{B}_8\text{O}_{11}(\text{OH})_4)$                                                                              |
| 248128    | Monoclinic     | $P2_1$      | $(\text{UO}_2)_2(\text{B}_9\text{O}_{14}(\text{OH})_4)$                                                                        |
| 254204    | Monoclinic     | $P2_1$      | $\text{K}_5(\text{UO}_2)_2(\text{B}_2\text{P}_3\text{O}_{12}(\text{OH}))_2(\text{OH})\cdot 2\text{H}_2\text{O}$                |
| 49364     | Monoclinic     | $P2_1$      | $(\text{NH}_4)_2\text{B}_4\text{O}_5(\text{OH})_4(\text{H}_2\text{O})_2$                                                       |
| 49365     | Monoclinic     | $P2_1$      | $(\text{NH}_4)_2\text{B}_4\text{O}_5(\text{OH})_4(\text{H}_2\text{O})_2$                                                       |
| 17641     | Monoclinic     | $P2_1$      | $\text{La}_3\text{B}_6\text{O}_{13}(\text{OH})$                                                                                |
| 19922     | Monoclinic     | $P2_1$      | $\text{Ba}_2(\text{B}_5\text{O}_8(\text{OH}))_2(\text{B}(\text{OH})_3)\cdot \text{H}_2\text{O}$                                |

| ICSD code | Crystal system | Space group | Formula                                                                                                                       |
|-----------|----------------|-------------|-------------------------------------------------------------------------------------------------------------------------------|
| 141235    | Monoclinic     | $P2_1$      | $\text{NaRb}_3\text{B}_6\text{O}_9(\text{OH})_3(\text{HCO}_3)$                                                                |
| 145071    | Monoclinic     | $P2_1$      | $\text{Zn}(\text{NH}_2\text{CH}_2\text{CH}_2\text{NH}_2)_2\text{Al}(\text{B}_5\text{O}_9(\text{OH}))(\text{BO}(\text{OH})_2)$ |
| 95447     | Monoclinic     | $C2$        | $\text{Na}_2\text{Ba}_2(\text{B}_{10}\text{O}_{17}(\text{OH})_2)$                                                             |
| 403149    | Monoclinic     | $C2$        | $\text{Ba}_3(\text{B}_{10}\text{O}_{17}(\text{OH})_2)$                                                                        |
| 92819     | Monoclinic     | $C2$        | $\text{Sr}_2(\text{B}_5\text{O}_9(\text{OH}))\cdot\text{H}_2\text{O}$                                                         |
| 182000    | Monoclinic     | $C2$        | $(\text{NH}_4)_6(\text{Mn}_3\text{B}_6\text{P}_9\text{O}_{36}(\text{OH})_3)\cdot 4\text{H}_2\text{O}$                         |
| 250334    | Monoclinic     | $C2$        | $\text{Pb}_2(\text{B}_4\text{O}_5(\text{OH})_6)\cdot\text{H}_2\text{O}$                                                       |
| 261799    | Monoclinic     | $C2$        | $\text{Pb}_2(\text{B}_4\text{O}_5(\text{OH})_4)(\text{OH})_2\cdot\text{H}_2\text{O}$                                          |
| 131283    | Monoclinic     | $C2$        | $\text{B}_5\text{DyH}_2\text{O}_{10}$                                                                                         |
| 11600     | Monoclinic     | $Pm$        | $\text{Mn}_5(\text{BO}_3)_3(\text{OH})$                                                                                       |
| 76661     | Monoclinic     | $Pc$        | $\text{Ca}_3(\text{B}_5\text{O}_6(\text{OH})_6)(\text{OH})\text{Cl}_2\cdot 8\text{H}_2\text{O}$                               |
| 89259     | Monoclinic     | $Pc$        | $\text{Ca}_3(\text{B}_5\text{O}_6(\text{OH})_6)(\text{OH})\text{Cl}_2\cdot 8\text{H}_2\text{O}$                               |
| 262542    | Monoclinic     | $Pc$        | $\text{Ba}_3\text{B}_6\text{O}_{11}(\text{OH})_2$                                                                             |
| 154523    | Monoclinic     | $Pc$        | $\text{Na}_4(\text{B}_{10}\text{O}_{16}(\text{OH})_2)\cdot 4\text{H}_2\text{O}$                                               |
| 26380     | Monoclinic     | $Pc$        | $\text{NH}_4(\text{B}_5\text{O}_6(\text{OH})_4)\cdot 2\text{H}_2\text{O}$                                                     |
| 110994    | Monoclinic     | $Cm$        | $(\text{Cu}(\text{NH}_3)_4(\text{H}_2\text{O})_2)(\text{B}_4\text{O}_5(\text{OH})_4)\cdot 2\text{H}_2\text{O}$                |
| 124825    | Monoclinic     | $Cm$        | $\text{Pr}_3\text{Mo}_4\text{B}_6\text{O}_{24}(\text{OH})_3$                                                                  |
| 2942      | Monoclinic     | $Cc$        | $\text{Sr}_2(\text{B}_5\text{O}_8(\text{OH}))_2(\text{B}(\text{OH})_3)\cdot\text{H}_2\text{O}$                                |
| 16921     | Monoclinic     | $Cc$        | $\text{Sr}_2(\text{B}_5\text{O}_8(\text{OH}))_2(\text{B}(\text{OH})_3)\cdot\text{H}_2\text{O}$                                |
| 251872    | Monoclinic     | $Cc$        | $\text{La}_2(\text{CH}_3\text{CO}_2)_2(\text{B}_5\text{O}_9(\text{OH}))\cdot\text{H}_2\text{O}$                               |
| 251873    | Monoclinic     | $Cc$        | $\text{Ce}_2(\text{CH}_3\text{CO}_2)_2(\text{B}_5\text{O}_9(\text{OH}))\cdot\text{H}_2\text{O}$                               |
| 251874    | Monoclinic     | $Cc$        | $\text{Pr}_2(\text{CH}_3\text{CO}_2)_2(\text{B}_5\text{O}_9(\text{OH}))\cdot\text{H}_2\text{O}$                               |
| 251875    | Monoclinic     | $Cc$        | $\text{La}_2(\text{CH}_3\text{CO}_2)_2(\text{B}_5\text{O}_9(\text{OH}))$                                                      |
| 251876    | Monoclinic     | $Cc$        | $\text{Ce}_2(\text{CH}_3\text{CO}_2)_2(\text{B}_5\text{O}_9(\text{OH}))$                                                      |
| 251877    | Monoclinic     | $Cc$        | $\text{Pr}_2(\text{CH}_3\text{CO}_2)_2(\text{B}_5\text{O}_9(\text{OH}))$                                                      |
| 260879    | Monoclinic     | $Cc$        | $\text{Na}_3(\text{B}_3\text{O}_4(\text{OH})_4)$                                                                              |
| 262373    | Monoclinic     | $Cc$        | $\text{Ce}(\text{B}_4\text{O}_6(\text{OH})_2)\text{Cl}$                                                                       |
| 425058    | Monoclinic     | $Cc$        | $\text{Cu}_3(\text{B}_2(\text{PO}_4)_3(\text{OH})_3)$                                                                         |
| 426915    | Monoclinic     | $Cc$        | $\text{Ca}_2(\text{B}_5\text{O}_9)(\text{OH})\cdot\text{H}_2\text{O}$                                                         |
| 760166    | Monoclinic     | $Cc$        | $\text{LaB}_4\text{O}_6(\text{OH})_2\text{Cl}$                                                                                |
| 760167    | Monoclinic     | $Cc$        | $\text{CeB}_4\text{O}_6(\text{OH})_2\text{Cl}$                                                                                |
| 95909     | Monoclinic     | $Cc$        | $\text{Pr}(\text{B}_4\text{O}_6(\text{OH})_2)\text{Cl}$                                                                       |
| 95910     | Monoclinic     | $Cc$        | $\text{Nd}(\text{B}_4\text{O}_6(\text{OH})_2)\text{Cl}$                                                                       |
| 151307    | Monoclinic     | $Cc$        | $(\text{Ru}_2((\text{CH}_3)\text{COO})_4(\text{H}_2\text{O})_2)(\text{BF}_4)$                                                 |
| 182938    | Monoclinic     | $Cc$        | $\text{Na}(\text{UO}_2)(\text{B}_5\text{O}_8)(\text{OH})\text{F}\cdot\text{H}_2\text{O}$                                      |
| 182941    | Monoclinic     | $Cc$        | $\text{Rb}((\text{UO}_2)(\text{B}_5\text{O}_8)(\text{OH})\text{F})$                                                           |
| 182943    | Monoclinic     | $Cc$        | $\text{Na}((\text{NpO}_2)(\text{B}_5\text{O}_8)(\text{OH})\text{F})\cdot\text{H}_2\text{O}$                                   |
| 253445    | Monoclinic     | $Cc$        | $\text{Co}_3(\text{BPO}_4)_2(\text{PO}_4)(\text{OH})_3$                                                                       |
| 261402    | Monoclinic     | $Cc$        | $\text{Ba}_3(\text{Ge}_2\text{B}_7\text{O}_{16}(\text{OH})_2)(\text{OH})\cdot\text{H}_2\text{O}$                              |
| 261422    | Monoclinic     | $Cc$        | $(\text{UO}_2)(\text{B}_8\text{O}_{11}(\text{OH})_4)$                                                                         |
| 261423    | Monoclinic     | $Cc$        | $(\text{NpO}_2)(\text{B}_8\text{O}_{11}(\text{OH})_4)$                                                                        |
| 261424    | Monoclinic     | $Cc$        | $(\text{PuO}_2)(\text{B}_8\text{O}_{11}(\text{OH})_4)$                                                                        |
| 262913    | Monoclinic     | $Cc$        | $\text{La}(\text{B}_4\text{O}_6(\text{OH})_2)\text{Cl}$                                                                       |
| 262914    | Monoclinic     | $Cc$        | $\text{Ce}(\text{B}_4\text{O}_6(\text{OH})_2)\text{Cl}$                                                                       |
| 262918    | Monoclinic     | $Cc$        | $\text{Pu}(\text{B}_4\text{O}_6(\text{OH})_2)\text{Cl}$                                                                       |

| ICSD code | Crystal system | Space group                                     | Formula                                                                                                                             |
|-----------|----------------|-------------------------------------------------|-------------------------------------------------------------------------------------------------------------------------------------|
| 420984    | Monoclinic     | <i>Cc</i>                                       | Na(UO <sub>2</sub> )(B <sub>6</sub> O <sub>10</sub> (OH))·2H <sub>2</sub> O                                                         |
| 420987    | Monoclinic     | <i>Cc</i>                                       | PuO <sub>2</sub> (B <sub>8</sub> O <sub>11</sub> (OH) <sub>4</sub> )                                                                |
| 423058    | Monoclinic     | <i>Cc</i>                                       | Pu(B <sub>4</sub> O <sub>6</sub> (OH) <sub>2</sub> Cl)                                                                              |
| 124040    | Monoclinic     | <i>Cc</i>                                       | Ba <sub>2</sub> B <sub>10</sub> O <sub>16</sub> (OH) <sub>2</sub> (H <sub>3</sub> BO <sub>3</sub> )·H <sub>2</sub> O                |
| 34648     | Orthorhombic   | <i>P2<sub>1</sub>2<sub>1</sub>2<sub>1</sub></i> | K <sub>2</sub> (B <sub>4</sub> O <sub>5</sub> (OH) <sub>4</sub> )·2H <sub>2</sub> O                                                 |
| 59278     | Orthorhombic   | <i>P2<sub>1</sub>2<sub>1</sub>2<sub>1</sub></i> | (NH <sub>4</sub> ) <sub>2</sub> Ca(B <sub>4</sub> O <sub>5</sub> (OH) <sub>4</sub> ) <sub>2</sub> ·8H <sub>2</sub> O                |
| 81193     | Orthorhombic   | <i>P2<sub>1</sub>2<sub>1</sub>2<sub>1</sub></i> | (B(C <sub>2</sub> H <sub>6</sub> N <sub>5</sub> ))(OH) <sub>2</sub> ·H <sub>2</sub> O                                               |
| 155932    | Orthorhombic   | <i>P2<sub>1</sub>2<sub>1</sub>2<sub>1</sub></i> | (Mg <sub>2</sub> (H <sub>2</sub> O))(BP <sub>3</sub> O <sub>9</sub> (OH) <sub>4</sub> )                                             |
| 425065    | Orthorhombic   | <i>P2<sub>1</sub>2<sub>1</sub>2<sub>1</sub></i> | LiCu <sub>2</sub> (BP <sub>2</sub> O <sub>8</sub> (OH) <sub>2</sub> )                                                               |
| 4229      | Orthorhombic   | <i>P2<sub>1</sub>2<sub>1</sub>2<sub>1</sub></i> | Rb <sub>2</sub> Sr(B <sub>4</sub> O <sub>5</sub> (OH) <sub>4</sub> ) <sub>2</sub> ·8H <sub>2</sub> O                                |
| 35090     | Orthorhombic   | <i>P2<sub>1</sub>2<sub>1</sub>2<sub>1</sub></i> | CaK <sub>2</sub> (B <sub>4</sub> O <sub>5</sub> (OH) <sub>4</sub> ) <sub>2</sub> ·8H <sub>2</sub> O                                 |
| 80648     | Orthorhombic   | <i>P2<sub>1</sub>2<sub>1</sub>2<sub>1</sub></i> | (NH <sub>4</sub> ) <sub>2</sub> Ca(B <sub>4</sub> O <sub>5</sub> (OH) <sub>4</sub> ) <sub>2</sub> ·8H <sub>2</sub> O                |
| 93005     | Orthorhombic   | <i>P2<sub>1</sub>2<sub>1</sub>2<sub>1</sub></i> | K <sub>2</sub> Ca(B <sub>4</sub> O <sub>5</sub> (OH) <sub>4</sub> ) <sub>2</sub> ·8H <sub>2</sub> O                                 |
| 98351     | Orthorhombic   | <i>P2<sub>1</sub>2<sub>1</sub>2<sub>1</sub></i> | Rb <sub>2</sub> Ca(B <sub>4</sub> O <sub>5</sub> (OH) <sub>4</sub> ) <sub>2</sub> ·8H <sub>2</sub> O                                |
| 99219     | Orthorhombic   | <i>P2<sub>1</sub>2<sub>1</sub>2<sub>1</sub></i> | Cs <sub>2</sub> Ca(B <sub>4</sub> O <sub>5</sub> (OH) <sub>4</sub> ) <sub>2</sub> ·8H <sub>2</sub> O                                |
| 100670    | Orthorhombic   | <i>P2<sub>1</sub>2<sub>1</sub>2<sub>1</sub></i> | Tl <sub>2</sub> (B <sub>4</sub> O <sub>6</sub> (OH) <sub>2</sub> )·2H <sub>2</sub> O                                                |
| 192187    | Orthorhombic   | <i>P2<sub>1</sub>2<sub>1</sub>2<sub>1</sub></i> | K <sub>2</sub> Ca(B <sub>4</sub> O <sub>5</sub> (OH) <sub>4</sub> ) <sub>2</sub> ·8H <sub>2</sub> O                                 |
| 200950    | Orthorhombic   | <i>P2<sub>1</sub>2<sub>1</sub>2<sub>1</sub></i> | K <sub>2</sub> Ca(B <sub>4</sub> O <sub>5</sub> (OH) <sub>4</sub> ) <sub>2</sub> ·8H <sub>2</sub> O                                 |
| 263926    | Orthorhombic   | <i>P2<sub>1</sub>2<sub>1</sub>2<sub>1</sub></i> | RbSe <sub>3</sub> B <sub>2</sub> O <sub>9</sub> (OH)                                                                                |
| 263927    | Orthorhombic   | <i>P2<sub>1</sub>2<sub>1</sub>2<sub>1</sub></i> | CsSe <sub>3</sub> B <sub>2</sub> O <sub>9</sub> (OH)                                                                                |
| 57297     | Orthorhombic   | <i>P2<sub>1</sub>2<sub>1</sub>2<sub>1</sub></i> | Ba(BO <sub>2</sub> (OH))                                                                                                            |
| 13423     | Orthorhombic   | <i>C222</i>                                     | Li <sub>2</sub> CsB <sub>7</sub> O <sub>10</sub> ·4H <sub>2</sub> O                                                                 |
| 431106    | Orthorhombic   | <i>Pca2<sub>1</sub></i>                         | Na(B <sub>5</sub> O <sub>7</sub> (OH) <sub>2</sub> )·H <sub>2</sub> O                                                               |
| 250215    | Orthorhombic   | <i>Pnc2</i>                                     | CaLi <sub>4</sub> (B <sub>5</sub> O <sub>8</sub> (OH) <sub>2</sub> ) <sub>2</sub>                                                   |
| 36431     | Orthorhombic   | <i>Pnc2</i>                                     | Li <sub>3</sub> (B <sub>5</sub> O <sub>8</sub> (OH) <sub>2</sub> )                                                                  |
| 413627    | Orthorhombic   | <i>Pmn2<sub>1</sub></i>                         | K <sub>7</sub> ((BO <sub>3</sub> )Mn(B <sub>12</sub> O <sub>18</sub> (OH) <sub>6</sub> ))·H <sub>2</sub> O                          |
| 70514     | Orthorhombic   | <i>Pmn2<sub>1</sub></i>                         | K <sub>7</sub> ((BO <sub>3</sub> )Co(B <sub>12</sub> O <sub>18</sub> (OH) <sub>6</sub> ))·H <sub>2</sub> O                          |
| 145793    | Orthorhombic   | <i>Pmn2<sub>1</sub></i>                         | Tb <sub>3</sub> B <sub>10</sub> O <sub>17</sub> (OH) <sub>5</sub>                                                                   |
| 22192     | Orthorhombic   | <i>Pna2<sub>1</sub></i>                         | CaB <sub>3</sub> O <sub>5</sub> (OH)                                                                                                |
| 23880     | Orthorhombic   | <i>Pna2<sub>1</sub></i>                         | CaB <sub>3</sub> O <sub>5</sub> (OH)                                                                                                |
| 1973      | Orthorhombic   | <i>Pna2<sub>1</sub></i>                         | (Na(H <sub>2</sub> O)) <sub>2</sub> (B <sub>5</sub> O <sub>8</sub> (OH))                                                            |
| 34700     | Orthorhombic   | <i>Pna2<sub>1</sub></i>                         | K <sub>2</sub> (B <sub>5</sub> O <sub>8</sub> (OH))·2H <sub>2</sub> O                                                               |
| 59277     | Orthorhombic   | <i>Pna2<sub>1</sub></i>                         | K <sub>2</sub> Sr(B <sub>4</sub> O <sub>5</sub> (OH) <sub>4</sub> ) <sub>2</sub> ·10H <sub>2</sub> O                                |
| 249876    | Orthorhombic   | <i>Pna2<sub>1</sub></i>                         | Na <sub>2</sub> B <sub>5</sub> O <sub>8</sub> (OH)·2H <sub>2</sub> O                                                                |
| 252381    | Orthorhombic   | <i>Pna2<sub>1</sub></i>                         | CaB <sub>3</sub> O <sub>5</sub> (OH)                                                                                                |
| 426601    | Orthorhombic   | <i>Pna2<sub>1</sub></i>                         | Mg(B <sub>6</sub> O <sub>9</sub> (OH) <sub>2</sub> )·4H <sub>2</sub> O                                                              |
| 4220      | Orthorhombic   | <i>Pna2<sub>1</sub></i>                         | K <sub>3</sub> (B <sub>3</sub> O <sub>4</sub> (OH) <sub>4</sub> )·2H <sub>2</sub> O                                                 |
| 4221      | Orthorhombic   | <i>Pna2<sub>1</sub></i>                         | Rb <sub>3</sub> (B <sub>3</sub> O <sub>4</sub> (OH) <sub>4</sub> )·2H <sub>2</sub> O                                                |
| 200266    | Orthorhombic   | <i>Pna2<sub>1</sub></i>                         | K <sub>3</sub> (B <sub>3</sub> O <sub>4</sub> (OH) <sub>4</sub> )·2H <sub>2</sub> O                                                 |
| 408211    | Orthorhombic   | <i>Pna2<sub>1</sub></i>                         | Na <sub>2</sub> (BP <sub>2</sub> O <sub>7</sub> (OH))                                                                               |
| 133088    | Orthorhombic   | <i>Pna2<sub>1</sub></i>                         | KHC <sub>2</sub> O <sub>4</sub> B(OH) <sub>3</sub>                                                                                  |
| 117561    | Orthorhombic   | <i>Pna2<sub>1</sub></i>                         | La <sub>2</sub> B <sub>3</sub> O <sub>4</sub> (OH) <sub>3</sub> (SO <sub>4</sub> ) <sub>2</sub>                                     |
| 253012    | Orthorhombic   | <i>Cmc2<sub>1</sub></i>                         | K <sub>3</sub> B <sub>3</sub> O <sub>4</sub> (OH) <sub>4</sub> ·2H <sub>2</sub> O                                                   |
| 138088    | Orthorhombic   | <i>Cmc2<sub>1</sub></i>                         | Na <sub>8</sub> Li <sub>2</sub> (B <sub>6</sub> O <sub>10</sub> ) <sub>4</sub> (B(OH) <sub>3</sub> ) <sub>2</sub> (OH) <sub>2</sub> |
| 113334    | Orthorhombic   | <i>Cmc2<sub>1</sub></i>                         | (NH <sub>4</sub> ) <sub>2</sub> (B <sub>4</sub> O <sub>5</sub> (OH) <sub>4</sub> )·2H <sub>2</sub> O                                |

| ICSD code | Crystal system | Space group                                | Formula                                                                                                                                                                                                    |
|-----------|----------------|--------------------------------------------|------------------------------------------------------------------------------------------------------------------------------------------------------------------------------------------------------------|
| 63014     | Orthorhombic   | <i>Amm2</i>                                | Tl <sub>4</sub> Cu(Cu <sub>2</sub> B <sub>18</sub> O <sub>28</sub> (OH) <sub>8</sub> )·10H <sub>2</sub> O                                                                                                  |
| 241953    | Orthorhombic   | <i>Ama2</i>                                | K((UO <sub>2</sub> )B <sub>6</sub> O <sub>10</sub> (OH))                                                                                                                                                   |
| 6292      | Orthorhombic   | <i>Aba2</i>                                | K(B <sub>5</sub> O <sub>6</sub> (OH) <sub>4</sub> )·2H <sub>2</sub> O                                                                                                                                      |
| 29406     | Orthorhombic   | <i>Aba2</i>                                | RbB <sub>5</sub> O <sub>6</sub> (OH) <sub>4</sub> ·2H <sub>2</sub> O                                                                                                                                       |
| 90001     | Orthorhombic   | <i>Aba2</i>                                | (NH <sub>4</sub> )(B <sub>5</sub> O <sub>6</sub> (OH) <sub>4</sub> )·2H <sub>2</sub> O                                                                                                                     |
| 410811    | Orthorhombic   | <i>Aba2</i>                                | (NH <sub>4</sub> )(B <sub>5</sub> O <sub>6</sub> (OH) <sub>4</sub> )·2H <sub>2</sub> O                                                                                                                     |
| 21332     | Orthorhombic   | <i>Aba2</i>                                | LiNaRbB <sub>5</sub> O <sub>8</sub> (OH) <sub>2</sub>                                                                                                                                                      |
| 4481      | Orthorhombic   | <i>Fdd2</i>                                | K <sub>3</sub> B <sub>5</sub> O <sub>8</sub> (OH) <sub>2</sub>                                                                                                                                             |
| 425727    | Orthorhombic   | <i>Fdd2</i>                                | Ba <sub>3</sub> Al <sub>2</sub> (B <sub>3</sub> O <sub>6</sub> (OH)) <sub>2</sub> (B <sub>4</sub> O <sub>7</sub> (OH) <sub>2</sub> )                                                                       |
| 425867    | Orthorhombic   | <i>Fdd2</i>                                | Ba <sub>3</sub> Ga <sub>2</sub> (B <sub>3</sub> O <sub>6</sub> (OH)) <sub>2</sub> (B <sub>4</sub> O <sub>7</sub> (OH) <sub>2</sub> )                                                                       |
| 264389    | Orthorhombic   | <i>Fdd2</i>                                | InB <sub>6</sub> O <sub>9</sub> (OH) <sub>3</sub>                                                                                                                                                          |
| 20662     | Tetragonal     | <i>P4<sub>2</sub></i>                      | Mg(B <sub>2</sub> O(OH) <sub>6</sub> )                                                                                                                                                                     |
| 24920     | Tetragonal     | <i>P4<sub>2</sub></i>                      | Mg(B <sub>2</sub> O(OH) <sub>6</sub> )                                                                                                                                                                     |
| 4222      | Tetragonal     | <i><math>\bar{4}</math></i>                | Cs(B(OH) <sub>4</sub> )·2H <sub>2</sub> O                                                                                                                                                                  |
| 27527     | Tetragonal     | <i><math>\bar{4}</math></i>                | Ca <sub>2</sub> BAsO <sub>4</sub> (OH) <sub>4</sub>                                                                                                                                                        |
| 142127    | Tetragonal     | <i><math>\bar{4}</math></i>                | H <sub>2</sub> Na <sub>2</sub> K <sub>2</sub> (OCu <sub>4</sub> B <sub>20</sub> O <sub>32</sub> (OH) <sub>8</sub> )·21H <sub>2</sub> O                                                                     |
| 142128    | Tetragonal     | <i><math>\bar{4}</math></i>                | H <sub>2</sub> Rb <sub>1.6</sub> K <sub>2.4</sub> (OCu <sub>4</sub> B <sub>20</sub> O <sub>32</sub> (OH) <sub>8</sub> )·15H <sub>2</sub> O                                                                 |
| 20155     | Tetragonal     | <i>P4<sub>1</sub>2<sub>1</sub>2</i>        | Li <sub>3</sub> (B <sub>5</sub> O <sub>8</sub> (OH) <sub>2</sub> )                                                                                                                                         |
| 20173     | Tetragonal     | <i>P4<sub>1</sub>2<sub>1</sub>2</i>        | Li <sub>3</sub> (B <sub>5</sub> O <sub>8</sub> (OH) <sub>2</sub> )                                                                                                                                         |
| 418166    | Tetragonal     | <i>P4<sub>3</sub>2<sub>1</sub>2</i>        | Li <sub>3</sub> (B <sub>5</sub> O <sub>8</sub> (OH) <sub>2</sub> )                                                                                                                                         |
| 34580     | Tetragonal     | <i>P<math>\bar{4}</math><sub>2</sub>1c</i> | K <sub>6</sub> Al <sub>4</sub> Si <sub>6</sub> BH <sub>4</sub> O <sub>24</sub> Cl                                                                                                                          |
| 79472     | Trigonal       | <i>P3</i>                                  | (Li(H <sub>2</sub> O) <sub>4</sub> )(B(OH) <sub>4</sub> )·2H <sub>2</sub> O                                                                                                                                |
| 430533    | Trigonal       | <i>P3</i>                                  | Li(H <sub>2</sub> O) <sub>4</sub> B(OH) <sub>4</sub> ·2H <sub>2</sub> O                                                                                                                                    |
| 431212    | Trigonal       | <i>P3<sub>2</sub></i>                      | Pb <sub>6</sub> B <sub>12</sub> O <sub>21</sub> (OH) <sub>6</sub>                                                                                                                                          |
| 240324    | Trigonal       | <i>P3<sub>1</sub>21</i>                    | Co(BPO <sub>4</sub> (OH) <sub>2</sub> )                                                                                                                                                                    |
| 416089    | Trigonal       | <i>P3<sub>1</sub>21</i>                    | Mg(BPO <sub>4</sub> (OH) <sub>2</sub> )                                                                                                                                                                    |
| 416129    | Trigonal       | <i>P3<sub>1</sub>21</i>                    | Ni(BPO <sub>4</sub> (OH) <sub>2</sub> )                                                                                                                                                                    |
| 431536    | Trigonal       | <i>P3<sub>1</sub>21</i>                    | Ba <sub>2</sub> (B <sub>4</sub> O <sub>7</sub> (OH) <sub>2</sub> )                                                                                                                                         |
| 240322    | Trigonal       | <i>P3<sub>2</sub>21</i>                    | Mn(BPO <sub>4</sub> (OH) <sub>2</sub> )                                                                                                                                                                    |
| 240323    | Trigonal       | <i>P3<sub>2</sub>21</i>                    | Fe(BPO <sub>4</sub> (OH) <sub>2</sub> )                                                                                                                                                                    |
| 10266     | Trigonal       | <i>R32</i>                                 | Na <sub>2</sub> (B <sub>4</sub> O <sub>5</sub> (OH) <sub>4</sub> )·3H <sub>2</sub> O                                                                                                                       |
| 70998     | Trigonal       | <i>R32</i>                                 | NaRb <sub>6</sub> (B <sub>4</sub> O <sub>5</sub> (OH) <sub>4</sub> ) <sub>3</sub> (BO <sub>2</sub> )                                                                                                       |
| 70999     | Trigonal       | <i>R32</i>                                 | NaRb <sub>6</sub> (B <sub>4</sub> O <sub>5</sub> (OH) <sub>4</sub> ) <sub>3</sub> (BO <sub>2</sub> )                                                                                                       |
| 4493      | Trigonal       | <i>P31c</i>                                | Pb <sub>3</sub> (OH)(B <sub>9</sub> O <sub>16</sub> )(B(OH) <sub>3</sub> )                                                                                                                                 |
| 4494      | Trigonal       | <i>P31c</i>                                | Ba <sub>3</sub> (OH)(B <sub>9</sub> O <sub>16</sub> )(B(OH) <sub>3</sub> )                                                                                                                                 |
| 428677    | Trigonal       | <i>P31c</i>                                | LiBa <sub>3</sub> (OH)(B <sub>9</sub> O <sub>16</sub> )(B(OH) <sub>4</sub> )                                                                                                                               |
| 94525     | Trigonal       | <i>P31c</i>                                | Pb <sub>3</sub> (OH)(B <sub>9</sub> O <sub>16</sub> )(B(OH) <sub>3</sub> )                                                                                                                                 |
| 261808    | Trigonal       | <i>P31c</i>                                | Pb <sub>3</sub> (OH)(B <sub>9</sub> O <sub>16</sub> )(B(OH) <sub>3</sub> )                                                                                                                                 |
| 42341     | Trigonal       | <i>R3m</i>                                 | NaAl <sub>9</sub> (BO <sub>3</sub> ) <sub>3</sub> (Si <sub>6</sub> O <sub>21</sub> )(OH)                                                                                                                   |
| 136829    | Trigonal       | <i>R3m</i>                                 | (Na <sub>0.479</sub> Li <sub>0.024</sub> )Al <sub>2.976</sub> Al <sub>6</sub> (Si <sub>5.676</sub> B <sub>0.324</sub> O <sub>18</sub> )(BO <sub>3</sub> ) <sub>3</sub> (OH) <sub>3</sub> O                 |
| 136830    | Trigonal       | <i>R3m</i>                                 | (Na <sub>0.617</sub> Li <sub>0.165</sub> )Al <sub>2.835</sub> Al <sub>6</sub> (Si <sub>5.718</sub> B <sub>0.282</sub> O <sub>18</sub> )(BO <sub>3</sub> ) <sub>3</sub> (OH) <sub>3</sub> O                 |
| 112290    | Trigonal       | <i>R3m</i>                                 | (Na <sub>0.44</sub> Ca <sub>0.56</sub> )(Mg <sub>1.56</sub> Fe <sub>1.55</sub> Al <sub>5.89</sub> )(Si <sub>6</sub> O <sub>18</sub> )(BO <sub>3</sub> ) <sub>3</sub> (OH) <sub>3</sub> O                   |
| 112291    | Trigonal       | <i>R3m</i>                                 | (Na <sub>0.095</sub> Ca <sub>0.905</sub> )(Mg <sub>2.30</sub> Fe <sub>0.83</sub> Al <sub>5.86</sub> )(Si <sub>6</sub> O <sub>18</sub> )(BO <sub>3</sub> ) <sub>3</sub> (OH) <sub>3</sub> O                 |
| 137133    | Trigonal       | <i>R3m</i>                                 | Na <sub>0.768</sub> (Mn <sub>1.032</sub> Al <sub>1.878</sub> Fe <sub>0.09</sub> )Al <sub>6</sub> (Si <sub>6</sub> O <sub>18</sub> )(BO <sub>3</sub> ) <sub>3</sub> (OH) <sub>3</sub> O                     |
| 127049    | Trigonal       | <i>R3m</i>                                 | Na <sub>0.824</sub> K <sub>0.176</sub> Fe <sub>3</sub> (Fe <sub>2.397</sub> Mg <sub>0.681</sub> Al <sub>2.922</sub> )(Si <sub>6</sub> O <sub>18</sub> )(BO <sub>3</sub> ) <sub>3</sub> (OH) <sub>3</sub> O |

| ICSD code | Crystal system | Space group             | Formula                                                                                                                                                                                                                                                                                                    |
|-----------|----------------|-------------------------|------------------------------------------------------------------------------------------------------------------------------------------------------------------------------------------------------------------------------------------------------------------------------------------------------------|
| 37833     | Trigonal       | <i>R3m</i>              | $\text{Na}_{0.42}(\text{Mn}_{1.39}\text{Fe}_{0.16}\text{Mg}_{0.01}\text{Al}_{1.14}\text{Fe}_{0.01}\text{Li}_{0.28}\text{Ti}_{0.01})\text{Al}_6((\text{Si}_{5.99}\text{Al}_{0.01})\text{O}_{18})$<br>$(\text{BO}_3)_3(\text{OH})_3((\text{OH})_{0.65}\text{F}_{0.03}\text{O}_{0.32})$                       |
| 37834     | Trigonal       | <i>R3m</i>              | $\text{Na}_{0.49}\text{Mn}_{0.49}(\text{Mn}_{0.90}\text{Fe}_{0.50}\text{Al}_{1.36}\text{Fe}_{0.04}\text{Li}_{0.17}\text{Zn}_{0.04})(\text{Al}_{5.91}\text{Mn}_{0.09})$<br>$((\text{Si}_{5.75}\text{B}_{0.25})\text{O}_{18})(\text{BO}_3)_3(\text{OH})_3((\text{OH})_{0.35}\text{F}_{0.17}\text{O}_{0.48})$ |
| 138478    | Trigonal       | <i>R3m</i>              | $\text{Ca}_{0.589}\text{Na}_{0.354}\text{Mg}_{1.196}\text{Fe}_{0.912}\text{Al}_{0.892}(\text{Al}_5\text{Mg})(\text{Si}_6\text{O}_{18})$<br>$(\text{BO}_3)_3(\text{OH})_3(\text{OH})_{0.945}\text{F}_{0.055}$                                                                                               |
| 112348    | Trigonal       | <i>R3m</i>              | $\text{Na}_{0.854}(\text{Al}_{1.124})_3(\text{Al}_{1.047})_6\text{Si}_6\text{B}_3\text{O}_{27}(\text{OH})_3(\text{F}_{0.58}(\text{OH})_{0.42})$                                                                                                                                                            |
| 112349    | Trigonal       | <i>R3m</i>              | $\text{Na}_{0.854}(\text{Al}_{1.173})_3(\text{Al}_{1.022})_6\text{Si}_6\text{B}_3\text{O}_{27}(\text{OH})_3(\text{F}_{0.58}(\text{OH})_{0.42})$                                                                                                                                                            |
| 112350    | Trigonal       | <i>R3m</i>              | $\text{Na}_{0.854}(\text{Al}_{1.169})_3(\text{Al}_{1.024})_6\text{Si}_6\text{B}_3\text{O}_{27}(\text{OH})_3(\text{F}_{0.58}(\text{OH})_{0.42})$                                                                                                                                                            |
| 112351    | Trigonal       | <i>R3m</i>              | $\text{Na}_{0.854}(\text{Al}_{1.175})_3(\text{Al}_{1.021})_6\text{Si}_6\text{B}_3\text{O}_{27}(\text{OH})_3(\text{F}_{0.58}(\text{OH})_{0.42})$                                                                                                                                                            |
| 112352    | Trigonal       | <i>R3m</i>              | $\text{Na}_{0.854}(\text{Al}_{1.176})_3(\text{Al}_{1.021})_6\text{Si}_6\text{B}_3\text{O}_{27}(\text{OH})_3(\text{F}_{0.58}(\text{OH})_{0.42})$                                                                                                                                                            |
| 112353    | Trigonal       | <i>R3m</i>              | $\text{Na}_{0.854}(\text{Al}_{1.181})_3(\text{Al}_{1.018})_6\text{Si}_6\text{B}_3\text{O}_{27}(\text{OH})_3(\text{F}_{0.58}(\text{OH})_{0.42})$                                                                                                                                                            |
| 112354    | Trigonal       | <i>R3m</i>              | $\text{Na}_{0.854}(\text{Al}_{1.184})_3(\text{Al}_{1.016})_6\text{Si}_6\text{B}_3\text{O}_{27}(\text{OH})_3(\text{F}_{0.58}(\text{OH})_{0.42})$                                                                                                                                                            |
| 112355    | Trigonal       | <i>R3m</i>              | $\text{Na}_{0.854}(\text{Al}_{1.185})_3(\text{Al}_{1.016})_6\text{Si}_6\text{B}_3\text{O}_{27}(\text{OH})_3(\text{F}_{0.58}(\text{OH})_{0.42})$                                                                                                                                                            |
| 112356    | Trigonal       | <i>R3m</i>              | $\text{Na}_{0.854}(\text{Al}_{1.180})_3(\text{Al}_{1.019})_6\text{Si}_6\text{B}_3\text{O}_{27}(\text{OH})_3(\text{F}_{0.58}(\text{OH})_{0.42})$                                                                                                                                                            |
| 112357    | Trigonal       | <i>R3m</i>              | $\text{Na}_{0.854}(\text{Al}_{1.186})_3(\text{Al}_{1.015})_6\text{Si}_6\text{B}_3\text{O}_{27}(\text{OH})_3(\text{F}_{0.58}(\text{OH})_{0.42})$                                                                                                                                                            |
| 112358    | Trigonal       | <i>R3m</i>              | $\text{Na}_{0.854}(\text{Al}_{1.183})_3(\text{Al}_{1.017})_6\text{Si}_6\text{B}_3\text{O}_{27}(\text{OH})_3(\text{F}_{0.58}(\text{OH})_{0.42})$                                                                                                                                                            |
| 112359    | Trigonal       | <i>R3m</i>              | $\text{Na}_{0.854}(\text{Al}_{1.183})_3(\text{Al}_{1.017})_6\text{Si}_6\text{B}_3\text{O}_{27}(\text{OH})_3(\text{F}_{0.58}(\text{OH})_{0.42})$                                                                                                                                                            |
| 112360    | Trigonal       | <i>R3m</i>              | $\text{Na}_{0.854}(\text{Al}_{1.176})_3(\text{Al}_{1.021})_6\text{Si}_6\text{B}_3\text{O}_{27}(\text{OH})_3(\text{F}_{0.58}(\text{OH})_{0.42})$                                                                                                                                                            |
| 112361    | Trigonal       | <i>R3m</i>              | $\text{Na}_{0.854}(\text{Al}_{1.175})_3(\text{Al}_{1.021})_6\text{Si}_6\text{B}_3\text{O}_{27}(\text{OH})_3(\text{F}_{0.58}(\text{OH})_{0.42})$                                                                                                                                                            |
| 112362    | Trigonal       | <i>R3m</i>              | $\text{Na}_{0.854}(\text{Al}_{1.169})_3(\text{Al}_{1.024})_6\text{Si}_6\text{B}_3\text{O}_{27}(\text{OH})_3(\text{F}_{0.58}(\text{OH})_{0.42})$                                                                                                                                                            |
| 112363    | Trigonal       | <i>R3m</i>              | $\text{Na}_{0.854}(\text{Al}_{1.127})_3(\text{Al}_{1.045})_6\text{Si}_6\text{B}_3\text{O}_{27}(\text{OH})_3(\text{F}_{0.58}(\text{OH})_{0.42})$                                                                                                                                                            |
| 112364    | Trigonal       | <i>R3m</i>              | $\text{Na}_{0.854}(\text{Al}_{1.109})_3(\text{Al}_{1.054})_6\text{Si}_6\text{B}_3\text{O}_{27}(\text{OH})_3(\text{F}_{0.58}(\text{OH})_{0.42})$                                                                                                                                                            |
| 112365    | Trigonal       | <i>R3m</i>              | $\text{Na}_{0.854}(\text{Al}_{1.109})_3(\text{Al}_{1.054})_6\text{Si}_6\text{B}_3\text{O}_{27}(\text{OH})_3(\text{F}_{0.58}(\text{OH})_{0.42})$                                                                                                                                                            |
| 143071    | Trigonal       | <i>R3m</i>              | $(\text{Na}_{0.40}\text{Ca}_{0.26})(\text{Al}_{2.04}\text{Li}_{0.78}\text{Mn}_{0.18})\text{Al}_6(\text{Si}_{5.5}\text{B}_{0.5})\text{O}_{18}$<br>$(\text{BO}_3)_3(\text{OH})_3((\text{OH})_{0.38}\text{F}_{0.13}\text{O}_{0.49})$                                                                          |
| 120219    | Trigonal       | <i>R3m</i>              | $\text{Na}_{0.781}(\text{Fe}_{0.697}\text{Al}_{0.303})_3(\text{Al}_{0.912}\text{Fe}_{0.088})_6(\text{Si}_6\text{O}_{18})$<br>$(\text{BO}_3)_3(\text{OH})_3((\text{OH})_{0.591}\text{F}_{0.409})$                                                                                                           |
| 125271    | Trigonal       | <i>R3m</i>              | $\text{Na}_{0.790}\text{Mg}_{1.329}\text{Fe}_{2.025}\text{Ca}_{0.210}\text{Al}_{5.646}(\text{Si}_6\text{O}_{18})(\text{BO}_3)_3(\text{OH})_3\text{O}$                                                                                                                                                      |
| 125066    | Trigonal       | <i>R3m</i>              | $(\text{Ca}_{0.56}\text{Na}_{0.44})(\text{Mg}_{1.515}\text{Fe}_{1.485})\text{Al}_6(\text{BO}_3)_3(\text{Si}_6\text{O}_{18})(\text{OH})_3(\text{O}_{0.79}\text{F}_{0.21})$                                                                                                                                  |
| 125067    | Trigonal       | <i>R3m</i>              | $(\text{Na}_{0.95}\text{Ca}_{0.05})(\text{Mg}_{1.71}\text{Fe}_{1.29})\text{Al}_6(\text{Si}_6\text{O}_{18})(\text{BO}_3)_3(\text{OH})_3\text{O}$                                                                                                                                                            |
| 127050    | Trigonal       | <i>R3m</i>              | $\text{Na}_{0.767}\text{K}_{0.233}\text{Fe}_3(\text{Fe}_{3.786}\text{Mg}_{0.336}\text{Al}_{1.878})(\text{Si}_6\text{O}_{18})(\text{BO}_3)_3(\text{OH})_3\text{O}$                                                                                                                                          |
| 127051    | Trigonal       | <i>R3m</i>              | $\text{Na}_{0.90}\text{K}_{0.10}\text{Fe}_3(\text{Fe}_{3.54}\text{Mg}_{0.402}\text{Al}_{2.058})(\text{Si}_6\text{O}_{18})(\text{BO}_3)_3(\text{OH})_3\text{O}$                                                                                                                                             |
| 127052    | Trigonal       | <i>R3m</i>              | $\text{Na}_{0.85}\text{K}_{0.15}\text{Fe}_3(\text{Fe}_{3.41}\text{Mg}_{0.43}\text{Al}_{2.17})(\text{Si}_6\text{O}_{18})(\text{BO}_3)_3(\text{OH})_3\text{O}$                                                                                                                                               |
| 127053    | Trigonal       | <i>R3m</i>              | $\text{Na}_{0.78}\text{K}_{0.22}\text{Fe}_3(\text{Fe}_{4.002}\text{Mg}_{0.276}\text{Al}_{1.722})(\text{Si}_6\text{O}_{18})(\text{BO}_3)_3(\text{OH})_3\text{O}$                                                                                                                                            |
| 421260    | Trigonal       | <i>R3c</i>              | $\text{Y}(\text{B}_2\text{O}_3(\text{OH}))_3$                                                                                                                                                                                                                                                              |
| 250161    | Trigonal       | <i>R3c</i>              | $\text{Ho}(\text{B}_6\text{O}_9(\text{OH})_3)$                                                                                                                                                                                                                                                             |
| 250162    | Trigonal       | <i>R3c</i>              | $\text{Gd}(\text{B}_6\text{O}_9(\text{OH})_3)$                                                                                                                                                                                                                                                             |
| 112337    | Hexagonal      | <i>P6<sub>3</sub></i>   | $\text{Ca}_3(\text{Si}_{0.64}\text{Al}_{0.36})((\text{B}(\text{OH})_4)_{0.64}(\text{CO}_3)_{1.08}(\text{AsO}_3)_{0.28})(\text{OH})_6 \cdot 12\text{H}_2\text{O}$                                                                                                                                           |
| 50539     | Hexagonal      | <i>P6<sub>3</sub>cm</i> | $\text{Pb}_5(\text{B}_3\text{O}_8(\text{OH})_3) \cdot \text{H}_2\text{O}$                                                                                                                                                                                                                                  |
| 238716    | Hexagonal      | <i>P6<sub>2</sub>m</i>  | $\text{KGd}(\text{B}_6\text{O}_{10}(\text{OH})_2)$                                                                                                                                                                                                                                                         |
| 432932    | Hexagonal      | <i>P6<sub>2</sub>m</i>  | $\text{Ni}_3\text{B}_{18}\text{O}_{28}(\text{OH})_4 \cdot 4\text{H}_2\text{O}$                                                                                                                                                                                                                             |
| 403324    | Hexagonal      | <i>P6<sub>2</sub>c</i>  | $\text{K}_9(\text{B}_4\text{O}_5(\text{OH})_4)_3(\text{CO}_3)\text{Br} \cdot 7\text{H}_2\text{O}$                                                                                                                                                                                                          |
| 403325    | Hexagonal      | <i>P6<sub>2</sub>c</i>  | $\text{K}_9(\text{B}_4\text{O}_5(\text{OH})_4)_3(\text{CO}_3)\text{Cl} \cdot 7\text{H}_2\text{O}$                                                                                                                                                                                                          |
| 425207    | Hexagonal      | <i>P6<sub>2</sub>c</i>  | $\text{Li}_3(\text{B}_8\text{O}_{12}(\text{OH})_3)$                                                                                                                                                                                                                                                        |

| ICSD code | Crystal system | Space group  | Formula                                              |
|-----------|----------------|--------------|------------------------------------------------------|
| 429622    | Hexagonal      | $P\bar{6}2c$ | $K_9(B_4O_5(OH)_4)_3(CO_3)(BH_4) \cdot 7H_2O$        |
| 14601     | Hexagonal      | $P\bar{6}2c$ | $NaK_{15}(B_4O_5(OH)_4)_6(NO_2)_2(CO_3) \cdot 7H_2O$ |
| 56497     | Cubic          | $P\bar{4}3m$ | $Na_8(Al_6Si_6O_{24})(B(OH)_4)_2$                    |
| 428956    | Cubic          | $F\bar{4}3c$ | $Na_4Ga_3B_4O_{12}(OH)$                              |

**Table S2** The basic information of hydroxyborates with 0D isolated anionic clusters.

| No. | ICSD code | Compounds                                                                      | (A+OH)/B ratio | Anionic units                                                                | FBB units                                                  | Anionic cluster                                            |
|-----|-----------|--------------------------------------------------------------------------------|----------------|------------------------------------------------------------------------------|------------------------------------------------------------|------------------------------------------------------------|
| 1   | 100400    | $(\text{NH}_4)_2(\text{B}_4\text{O}_5(\text{OH})_4) \cdot 2\text{H}_2\text{O}$ | 1.5            | $[\text{BO}_2(\text{OH})]$ , $[\text{BO}_3(\text{OH})]$                      | $[\text{B}_4\text{O}_5(\text{OH})_4]$                      | $[\text{B}_4\text{O}_5(\text{OH})_4]$                      |
| 2   | 49364     | $(\text{NH}_4)_2\text{B}_4\text{O}_5(\text{OH})_4 \cdot 2\text{H}_2\text{O}$   | 1.5            | $[\text{BO}_2(\text{OH})]$ , $[\text{BO}_3(\text{OH})]$                      | $[\text{B}_4\text{O}_5(\text{OH})_4]$                      | $[\text{B}_4\text{O}_5(\text{OH})_4]$                      |
| 3   | 49365     | $(\text{NH}_4)_2\text{B}_4\text{O}_5(\text{OH})_4 \cdot 2\text{H}_2\text{O}$   | 1.5            | $[\text{BO}_2(\text{OH})]$ , $[\text{BO}_3(\text{OH})]$                      | $[\text{B}_4\text{O}_5(\text{OH})_4]$                      | $[\text{B}_4\text{O}_5(\text{OH})_4]$                      |
| 4   | 26380     | $\text{NH}_4(\text{B}_5\text{O}_6(\text{OH})_4) \cdot 2\text{H}_2\text{O}$     | 1              | $[\text{BO}_2(\text{OH})]$ , $[\text{BO}_4]$                                 | $[\text{B}_5\text{O}_6(\text{OH})_4]$                      | $[\text{B}_5\text{O}_6(\text{OH})_4]$                      |
| 5   | 260879    | $\text{Na}_3(\text{B}_3\text{O}_4(\text{OH})_4)$                               | 2.333          | $[\text{BO}_3]$ , $[\text{BO}_2(\text{OH})_2]$                               | $[\text{B}_3\text{O}_4(\text{OH})_4]$                      | $[\text{B}_3\text{O}_4(\text{OH})_4]$                      |
| 6   | 34648     | $\text{K}_2(\text{B}_4\text{O}_5(\text{OH})_4) \cdot 2\text{H}_2\text{O}$      | 1.5            | $[\text{BO}_2(\text{OH})]$ , $[\text{BO}_4]$ ,<br>$[\text{BO}_3(\text{OH})]$ | $[\text{B}_4\text{O}_5(\text{OH})_4]$                      | $[\text{B}_4\text{O}_5(\text{OH})_4]$                      |
| 7   | 57297     | $\text{Ba}(\text{BO}_2(\text{OH}))$                                            | 2              | $[\text{BO}_2(\text{OH})]$                                                   | $[\text{BO}_2(\text{OH})]$                                 | $[\text{BO}_2(\text{OH})]$                                 |
| 8   | 253012    | $\text{K}_3\text{B}_3\text{O}_4(\text{OH})_4 \cdot 2\text{H}_2\text{O}$        | 2.333          | $[\text{BO}_3]$ , $[\text{BO}_2(\text{OH})_2]$                               | $[\text{B}_3\text{O}_4(\text{OH})_4]$                      | $[\text{B}_3\text{O}_4(\text{OH})_4]$                      |
| 9   | 113334    | $(\text{NH}_4)_2(\text{B}_4\text{O}_5(\text{OH})_4) \cdot 2\text{H}_2\text{O}$ | 1.5            | $[\text{BO}_2(\text{OH})]$ , $[\text{BO}_3(\text{OH})]$                      | $[\text{B}_4\text{O}_5(\text{OH})_4]$                      | $[\text{B}_4\text{O}_5(\text{OH})_4]$                      |
| 10  | 6292      | $\text{K}(\text{B}_5\text{O}_6(\text{OH})_4) \cdot 2\text{H}_2\text{O}$        | 1              | $[\text{BO}_2(\text{OH})]$ , $[\text{BO}_4]$                                 | $[\text{B}_5\text{O}_6(\text{OH})_4]$                      | $[\text{B}_5\text{O}_6(\text{OH})_4]$                      |
| 11  | 29406     | $\text{RbB}_5\text{O}_6(\text{OH})_4 \cdot 2\text{H}_2\text{O}$                | 1              | $[\text{BO}_2(\text{OH})]$ , $[\text{BO}_4]$                                 | $[\text{B}_5\text{O}_6(\text{OH})_4]$                      | $[\text{B}_5\text{O}_6(\text{OH})_4]$                      |
| 12  | 90001     | $(\text{NH}_4)(\text{B}_5\text{O}_6(\text{OH})_4) \cdot 2\text{H}_2\text{O}$   | 1              | $[\text{BO}_2(\text{OH})]$ , $[\text{BO}_4]$                                 | $[\text{B}_5\text{O}_6(\text{OH})_4]$                      | $[\text{B}_5\text{O}_6(\text{OH})_4]$                      |
| 13  | 410811    | $(\text{NH}_4)(\text{B}_5\text{O}_6(\text{OH})_4) \cdot 2\text{H}_2\text{O}$   | 1              | $[\text{BO}_2(\text{OH})]$ , $[\text{BO}_4]$                                 | $[\text{B}_5\text{O}_6(\text{OH})_4]$                      | $[\text{B}_5\text{O}_6(\text{OH})_4]$                      |
| 14  | 4481      | $\text{K}_3\text{B}_5\text{O}_8(\text{OH})_2$                                  | 1              | $[\text{BO}_3]$ , $[\text{BO}_2(\text{OH})]$ , $[\text{BO}_4]$               | $[\text{B}_5\text{O}_8(\text{OH})_2]$                      | $[\text{B}_5\text{O}_8(\text{OH})_2]$                      |
| 15  | 20662     | $\text{Mg}(\text{B}_2\text{O}(\text{OH})_6)$                                   | 3.5            | $[\text{BO}(\text{OH})_3]$                                                   | $[\text{B}_2\text{O}(\text{OH})_6]$                        | $[\text{B}_2\text{O}(\text{OH})_6]$                        |
| 16  | 24920     | $\text{Mg}(\text{B}_2\text{O}(\text{OH})_6)$                                   | 3.5            | $[\text{BO}(\text{OH})_3]$                                                   | $[\text{B}_2\text{O}(\text{OH})_6]$                        | $[\text{B}_2\text{O}(\text{OH})_6]$                        |
| 17  | 10266     | $\text{Na}_2(\text{B}_4\text{O}_5(\text{OH})_4) \cdot 3\text{H}_2\text{O}$     | 1.5            | $[\text{BO}_2(\text{OH})]$ , $[\text{BO}_3(\text{OH})]$                      | $[\text{B}_4\text{O}_5(\text{OH})_4]$                      | $[\text{B}_4\text{O}_5(\text{OH})_4]$                      |
| 18  | 70998     | $\text{NaRb}_6(\text{B}_4\text{O}_5(\text{OH})_4)_3 (\text{BO}_2)$             | 1.462          | $[\text{BO}_2]$ , $[\text{BO}_2(\text{OH})]$ ,<br>$[\text{BO}_3(\text{OH})]$ | $[\text{B}_4\text{O}_5(\text{OH})_4]$ ,<br>$[\text{BO}_2]$ | $[\text{B}_4\text{O}_5(\text{OH})_4]$ ,<br>$[\text{BO}_2]$ |
| 19  | 70999     | $\text{NaRb}_6(\text{B}_4\text{O}_5(\text{OH})_4)_3 (\text{BO}_2)$             | 1.462          | $[\text{BO}_2]$ , $[\text{BO}_2(\text{OH})]$ ,<br>$[\text{BO}_3(\text{OH})]$ | $[\text{B}_4\text{O}_5(\text{OH})_4]$ ,<br>$[\text{BO}_2]$ | $[\text{B}_4\text{O}_5(\text{OH})_4]$ ,<br>$[\text{BO}_2]$ |



**Table S3** The basic information of hydroxyborates with 1D infinite anionic chains.

| No. | ICSD code | Compounds                                                                                | (A+OH)/B<br>ratio | Anionic units                                                                       | FBB units                                           | Anionic chain                                                                 |
|-----|-----------|------------------------------------------------------------------------------------------|-------------------|-------------------------------------------------------------------------------------|-----------------------------------------------------|-------------------------------------------------------------------------------|
| 1   | 172480    | Bi(B <sub>4</sub> O <sub>6</sub> (OH) <sub>2</sub> )(OH)                                 | 0.75              | [BO <sub>3</sub> ], [BO <sub>2</sub> (OH)], [BO <sub>4</sub> ]                      | [B <sub>4</sub> O <sub>7</sub> (OH) <sub>2</sub> ]  | <sup>1</sup> [B <sub>4</sub> O <sub>6</sub> (OH) <sub>2</sub> ] <sub>∞</sub>  |
| 2   | 28426     | CaB <sub>3</sub> O <sub>4</sub> (OH) <sub>3</sub> ·H <sub>2</sub> O                      | 1.333             | [BO <sub>3</sub> ], [BO <sub>3</sub> (OH)],<br>[BO <sub>2</sub> (OH) <sub>2</sub> ] | [B <sub>3</sub> O <sub>5</sub> (OH) <sub>3</sub> ]  | <sup>1</sup> [B <sub>3</sub> O <sub>4</sub> (OH) <sub>3</sub> ] <sub>∞</sub>  |
| 3   | 28427     | CaB <sub>3</sub> O <sub>4</sub> (OH) <sub>3</sub> ·H <sub>2</sub> O                      | 1.333             | [BO <sub>3</sub> ], [BO <sub>3</sub> (OH)],<br>[BO <sub>2</sub> (OH) <sub>2</sub> ] | [B <sub>3</sub> O <sub>5</sub> (OH) <sub>3</sub> ]  | <sup>1</sup> [B <sub>3</sub> O <sub>4</sub> (OH) <sub>3</sub> ] <sub>∞</sub>  |
| 4   | 141235    | NaRb <sub>3</sub> B <sub>6</sub> O <sub>9</sub> (OH) <sub>3</sub><br>(HCO <sub>3</sub> ) | 1.167             | [BO <sub>2</sub> (OH)], [BO <sub>4</sub> ]                                          | [B <sub>6</sub> O <sub>11</sub> (OH) <sub>3</sub> ] | <sup>1</sup> [B <sub>6</sub> O <sub>9</sub> (OH) <sub>3</sub> ] <sub>∞</sub>  |
| 5   | 262542    | Ba <sub>3</sub> B <sub>6</sub> O <sub>11</sub> (OH) <sub>2</sub>                         | 0.833             | [BO <sub>3</sub> ], [BO <sub>4</sub> ], [BO <sub>2</sub> (OH) <sub>2</sub> ]        | [B <sub>6</sub> O <sub>13</sub> (OH) <sub>2</sub> ] | <sup>1</sup> [B <sub>6</sub> O <sub>11</sub> (OH) <sub>2</sub> ] <sub>∞</sub> |
| 6   | 431106    | Na(B <sub>5</sub> O <sub>7</sub> (OH) <sub>2</sub> )·H <sub>2</sub> O                    | 0.6               | [BO <sub>3</sub> ], [BO <sub>2</sub> (OH)], [BO <sub>4</sub> ]                      | [B <sub>5</sub> O <sub>8</sub> (OH) <sub>2</sub> ]  | <sup>1</sup> [B <sub>5</sub> O <sub>7</sub> (OH) <sub>2</sub> ] <sub>∞</sub>  |
| 7   | 431536    | Ba <sub>2</sub> (B <sub>4</sub> O <sub>7</sub> (OH) <sub>2</sub> )                       | 1                 | [BO <sub>3</sub> ], [BO <sub>4</sub> ], [BO <sub>2</sub> (OH) <sub>2</sub> ]        | [B <sub>4</sub> O <sub>9</sub> (OH) <sub>2</sub> ]  | <sup>1</sup> [B <sub>4</sub> O <sub>7</sub> (OH) <sub>2</sub> ] <sub>∞</sub>  |

**Table S4** The basic information of hydroxyborates with 2D anionic layered configurations.

| No. | ICSD code | Compounds                                                                                                                | (A+OH)/B ratio | Anionic units                                                                                                        | FBB units                                                                      | Anionic layered configuration                                                            |
|-----|-----------|--------------------------------------------------------------------------------------------------------------------------|----------------|----------------------------------------------------------------------------------------------------------------------|--------------------------------------------------------------------------------|------------------------------------------------------------------------------------------|
| 1   | 39637     | KCa <sub>4</sub> (B <sub>22</sub> O <sub>32</sub> )(OH) <sub>10</sub> Cl<br>·4H <sub>2</sub> O                           | 0.682          | [BO <sub>3</sub> ], [BO <sub>2</sub> (OH)],<br>[B(OH) <sub>3</sub> ], [BO <sub>4</sub> ]                             | [B(OH) <sub>3</sub> ],<br>[B <sub>5</sub> O <sub>10</sub> (OH)]                | [B(OH) <sub>3</sub> ],<br><sup>2</sup> [B <sub>5</sub> O <sub>8</sub> (OH)] <sub>∞</sub> |
| 2   | 187776    | KCa <sub>4</sub> (B <sub>22</sub> O <sub>32</sub> (OH) <sub>10</sub> Cl)<br>·4H <sub>2</sub> O                           | 0.682          | [BO <sub>3</sub> ], [BO <sub>2</sub> (OH)],<br>[B(OH) <sub>3</sub> ], [BO <sub>4</sub> ]                             | [B(OH) <sub>3</sub> ],<br>[B <sub>5</sub> O <sub>10</sub> (OH)]                | [B(OH) <sub>3</sub> ],<br><sup>2</sup> [B <sub>5</sub> O <sub>8</sub> (OH)] <sub>∞</sub> |
| 3   | 420549    | Ca <sub>2</sub> (B <sub>5</sub> O <sub>8</sub> (OH)) <sub>2</sub><br>B(OH) <sub>3</sub> ·H <sub>2</sub> O                | 0.636          | [BO <sub>3</sub> ], [BO <sub>2</sub> (OH)],<br>[B(OH) <sub>3</sub> ], [BO <sub>4</sub> ]                             | [B(OH) <sub>3</sub> ],<br>[B <sub>5</sub> O <sub>10</sub> (OH)]                | [B(OH) <sub>3</sub> ],<br><sup>2</sup> [B <sub>5</sub> O <sub>8</sub> (OH)] <sub>∞</sub> |
| 4   | 134988    | Ca <sub>2</sub> (B <sub>5</sub> O <sub>8</sub> (OH)) <sub>2</sub><br>(B(OH) <sub>3</sub> )·H <sub>2</sub> O              | 0.636          | [BO <sub>3</sub> ], [BO <sub>2</sub> (OH)],<br>[B(OH) <sub>3</sub> ], [BO <sub>4</sub> ]                             | [B(OH) <sub>3</sub> ],<br>[B <sub>10</sub> O <sub>20</sub> (OH) <sub>2</sub> ] | [B(OH) <sub>3</sub> ],<br><sup>2</sup> [B <sub>5</sub> O <sub>8</sub> (OH)] <sub>∞</sub> |
| 5   | 42570     | Ba <sub>2</sub> B <sub>13</sub> O <sub>19</sub> (OH) <sub>5</sub> ·5H <sub>2</sub> O                                     | 0.539          | [BO <sub>3</sub> ], [BO <sub>2</sub> (OH)],<br>[BO(OH) <sub>2</sub> ], [BO <sub>4</sub> ],<br>[BO <sub>3</sub> (OH)] | [B <sub>13</sub> O <sub>25</sub> (OH) <sub>5</sub> ]                           | <sup>2</sup> [B <sub>13</sub> O <sub>19</sub> (OH) <sub>5</sub> ] <sub>∞</sub>           |
| 6   | 171019    | CaB <sub>8</sub> O <sub>11</sub> (OH) <sub>4</sub>                                                                       | 0.625          | [BO <sub>3</sub> ], [BO <sub>2</sub> (OH)],<br>[BO(OH) <sub>2</sub> ], [BO <sub>4</sub> ]                            | [B <sub>8</sub> O <sub>13</sub> (OH) <sub>4</sub> ]                            | <sup>2</sup> [B <sub>8</sub> O <sub>11</sub> (OH) <sub>4</sub> ] <sub>∞</sub>            |
| 7   | 250323    | CaB <sub>8</sub> O <sub>11</sub> (OH) <sub>4</sub>                                                                       | 0.625          | [BO <sub>3</sub> ], [BO <sub>2</sub> (OH)],<br>[BO(OH) <sub>2</sub> ], [BO <sub>4</sub> ]                            | [B <sub>8</sub> O <sub>13</sub> (OH) <sub>4</sub> ]                            | <sup>2</sup> [B <sub>8</sub> O <sub>11</sub> (OH) <sub>4</sub> ] <sub>∞</sub>            |
| 8   | 262502    | Ba <sub>2</sub> (B <sub>6</sub> O <sub>9</sub> (OH) <sub>4</sub> )                                                       | 1              | [BO <sub>3</sub> ], [BO <sub>4</sub> ], [BO <sub>3</sub> (OH)]<br>, [BO <sub>2</sub> (OH) <sub>2</sub> ]             | [B <sub>6</sub> O <sub>13</sub> (OH) <sub>4</sub> ]                            | <sup>2</sup> [B <sub>6</sub> O <sub>9</sub> (OH) <sub>4</sub> ] <sub>∞</sub>             |
| 9   | 415082    | Ca(B <sub>8</sub> O <sub>11</sub> (OH) <sub>4</sub> )                                                                    | 0.625          | [BO <sub>3</sub> ], [BO <sub>2</sub> (OH)],<br>[BO(OH) <sub>2</sub> ], [BO <sub>4</sub> ]                            | [B <sub>8</sub> O <sub>13</sub> (OH) <sub>4</sub> ]                            | <sup>2</sup> [B <sub>8</sub> O <sub>11</sub> (OH) <sub>4</sub> ] <sub>∞</sub>            |
| 10  | 432814    | Ca <sub>2</sub> (B <sub>5</sub> O <sub>8</sub> (OH)) <sub>2</sub><br>(B(OH) <sub>3</sub> )·H <sub>2</sub> O              | 0.636          | [BO <sub>3</sub> ], [BO <sub>2</sub> (OH)],<br>[B(OH) <sub>3</sub> ], [BO <sub>4</sub> ]                             | [B(OH) <sub>3</sub> ],<br>[B <sub>5</sub> O <sub>10</sub> (OH)]                | [B(OH) <sub>3</sub> ],<br><sup>2</sup> [B <sub>5</sub> O <sub>8</sub> (OH)] <sub>∞</sub> |
| 11  | 4228      | Sr(B <sub>8</sub> O <sub>11</sub> (OH) <sub>4</sub> )                                                                    | 0.625          | [BO <sub>3</sub> ], [BO <sub>2</sub> (OH)],<br>[BO(OH) <sub>2</sub> ], [BO <sub>4</sub> ]                            | [B <sub>8</sub> O <sub>13</sub> (OH) <sub>4</sub> ]                            | <sup>2</sup> [B <sub>8</sub> O <sub>11</sub> (OH) <sub>4</sub> ] <sub>∞</sub>            |
| 12  | 20074     | Sr <sub>2</sub> (B <sub>5</sub> O <sub>8</sub> (OH)) <sub>2</sub><br>(B(OH) <sub>3</sub> )(H <sub>2</sub> O)             | 0.636          | [BO <sub>3</sub> ],[BO <sub>2</sub> (OH)],<br>[B(OH) <sub>3</sub> ], [BO <sub>4</sub> ]                              | [B(OH) <sub>3</sub> ],<br>[B <sub>5</sub> O <sub>10</sub> (OH)]                | [B(OH) <sub>3</sub> ],<br><sup>2</sup> [B <sub>5</sub> O <sub>8</sub> (OH)] <sub>∞</sub> |
| 13  | 28014     | Sr <sub>2</sub> (B <sub>5</sub> O <sub>8</sub> (OH)) <sub>2</sub><br>(B(OH) <sub>3</sub> )·H <sub>2</sub> O              | 0.636          | [BO <sub>3</sub> ],[BO <sub>2</sub> (OH)],<br>[B(OH) <sub>3</sub> ], [BO <sub>4</sub> ]                              | [B(OH) <sub>3</sub> ],<br>B <sub>5</sub> O <sub>10</sub> (OH)]                 | [B(OH) <sub>3</sub> ],<br><sup>2</sup> [B <sub>5</sub> O <sub>8</sub> (OH)] <sub>∞</sub> |
| 14  | 19922     | Ba <sub>2</sub> (B <sub>5</sub> O <sub>8</sub> (OH)) <sub>2</sub><br>(B(OH) <sub>3</sub> )·H <sub>2</sub> O              | 0.636          | [BO <sub>3</sub> ], [BO <sub>2</sub> (OH)],<br>[B(OH) <sub>3</sub> ], [BO <sub>4</sub> ]                             | [B(OH) <sub>3</sub> ],<br>[B <sub>5</sub> O <sub>10</sub> (OH)]                | [B(OH) <sub>3</sub> ],<br><sup>2</sup> [B <sub>5</sub> O <sub>8</sub> (OH)] <sub>∞</sub> |
| 15  | 95447     | Na <sub>2</sub> Ba <sub>2</sub> (B <sub>10</sub> O <sub>17</sub> (OH) <sub>2</sub> )                                     | 0.6            | [BO <sub>3</sub> ], [BO <sub>2</sub> (OH)], [BO <sub>4</sub> ]                                                       | [B <sub>10</sub> O <sub>21</sub> (OH) <sub>2</sub> ]                           | <sup>2</sup> [B <sub>10</sub> O <sub>17</sub> (OH) <sub>2</sub> ] <sub>∞</sub>           |
| 16  | 403149    | Ba <sub>3</sub> (B <sub>10</sub> O <sub>17</sub> (OH) <sub>2</sub> )                                                     | 0.5            | [BO <sub>3</sub> ], [BO <sub>2</sub> (OH)], [BO <sub>4</sub> ]                                                       | [B <sub>10</sub> O <sub>23</sub> (OH) <sub>2</sub> ]                           | <sup>2</sup> [B <sub>10</sub> O <sub>17</sub> (OH) <sub>2</sub> ] <sub>∞</sub>           |
| 17  | 154523    | Na <sub>4</sub> (B <sub>10</sub> O <sub>16</sub> (OH) <sub>2</sub> )·4H <sub>2</sub> O                                   | 0.6            | [BO <sub>3</sub> ], [BO <sub>2</sub> (OH)], [BO <sub>4</sub> ]                                                       | [B <sub>5</sub> O <sub>10</sub> (OH)]                                          | <sup>2</sup> [B <sub>5</sub> O <sub>8</sub> (OH)] <sub>∞</sub>                           |
| 18  | 2942      | Sr <sub>2</sub> (B <sub>5</sub> O <sub>8</sub> (OH)) <sub>2</sub><br>(B(OH) <sub>3</sub> )·H <sub>2</sub> O              | 0.636          | [BO <sub>3</sub> ], [BO <sub>2</sub> (OH)],<br>[B(OH) <sub>3</sub> ], [BO <sub>4</sub> ]                             | [B(OH) <sub>3</sub> ],<br>[B <sub>5</sub> O <sub>10</sub> (OH)]                | [B(OH) <sub>3</sub> ],<br><sup>2</sup> [B <sub>5</sub> O <sub>8</sub> (OH)] <sub>∞</sub> |
| 19  | 262913    | La(B <sub>4</sub> O <sub>6</sub> (OH) <sub>2</sub> Cl)                                                                   | 0.75           | [BO <sub>3</sub> ], [BO <sub>3</sub> (OH)]                                                                           | [B <sub>4</sub> O <sub>10</sub> (OH) <sub>2</sub> ]                            | <sup>2</sup> [B <sub>4</sub> O <sub>6</sub> (OH) <sub>2</sub> ] <sub>∞</sub>             |
| 20  | 124040    | Ba <sub>2</sub> B <sub>10</sub> O <sub>16</sub> (OH) <sub>2</sub> (H <sub>3</sub> BO <sub>3</sub> )<br>·H <sub>2</sub> O | 0.636          | [BO <sub>3</sub> ], [BO <sub>2</sub> (OH)],<br>[B(OH) <sub>3</sub> ], [BO <sub>4</sub> ]                             | [B(OH) <sub>3</sub> ],<br>[B <sub>5</sub> O <sub>10</sub> (OH)]                | [B(OH) <sub>3</sub> ],<br><sup>2</sup> [B <sub>5</sub> O <sub>8</sub> (OH)] <sub>∞</sub> |

| No. | ICSD code | Compounds                                                                         | (A+OH)/B<br>ratio | Anionic units                                                                | FBB units                                           | Anionic layered<br>configuration                                              |
|-----|-----------|-----------------------------------------------------------------------------------|-------------------|------------------------------------------------------------------------------|-----------------------------------------------------|-------------------------------------------------------------------------------|
| 21  | 13423     | Li <sub>2</sub> CsB <sub>7</sub> O <sub>10</sub> (OH) <sub>4</sub>                | 1                 | [BO <sub>3</sub> ], [BO <sub>4</sub> ], [BO <sub>2</sub> (OH) <sub>2</sub> ] | [B <sub>7</sub> O <sub>12</sub> (OH) <sub>4</sub> ] | <sup>2</sup> [B <sub>7</sub> O <sub>10</sub> (OH) <sub>4</sub> ] <sub>∞</sub> |
| 22  | 250215    | CaLi <sub>4</sub> (B <sub>5</sub> O <sub>8</sub> (OH) <sub>2</sub> ) <sub>2</sub> | 0.9               | [BO <sub>3</sub> ], [BO <sub>4</sub> ], [BO <sub>3</sub> (OH)]               | [B <sub>5</sub> O <sub>10</sub> (OH) <sub>2</sub> ] | <sup>2</sup> [B <sub>5</sub> O <sub>8</sub> (OH) <sub>2</sub> ] <sub>∞</sub>  |
| 23  | 36431     | Li <sub>3</sub> (B <sub>5</sub> O <sub>8</sub> (OH) <sub>2</sub> )                | 1                 | [BO <sub>3</sub> ], [BO <sub>4</sub> ], [BO <sub>3</sub> (OH)]               | [B <sub>5</sub> O <sub>10</sub> (OH) <sub>2</sub> ] | <sup>2</sup> [B <sub>5</sub> O <sub>8</sub> (OH) <sub>2</sub> ] <sub>∞</sub>  |
| 24  | 22192     | CaB <sub>3</sub> O <sub>5</sub> (OH)                                              | 0.667             | [BO <sub>3</sub> ], [BO <sub>4</sub> ], [BO <sub>3</sub> (OH)]               | [B <sub>3</sub> O <sub>7</sub> (OH)]                | <sup>2</sup> [B <sub>3</sub> O <sub>5</sub> (OH)] <sub>∞</sub>                |
| 25  | 23880     | CaB <sub>3</sub> O <sub>5</sub> (OH)                                              | 0.667             | [BO <sub>3</sub> ], [BO <sub>4</sub> ], [BO <sub>3</sub> (OH)]               | [B <sub>3</sub> O <sub>7</sub> (OH)]                | <sup>2</sup> [B <sub>3</sub> O <sub>5</sub> (OH)] <sub>∞</sub>                |
| 26  | 1973      | (Na(H <sub>2</sub> O)) <sub>2</sub> (B <sub>5</sub> O <sub>8</sub> (OH))          | 0.6               | [BO <sub>3</sub> ], [BO <sub>2</sub> (OH)], [BO <sub>4</sub> ]               | [B <sub>5</sub> O <sub>10</sub> (OH)]               | <sup>2</sup> [B <sub>5</sub> O <sub>8</sub> (OH)] <sub>∞</sub>                |
| 27  | 249876    | Na <sub>2</sub> B <sub>5</sub> O <sub>8</sub> (OH)·2H <sub>2</sub> O              | 0.6               | [BO <sub>3</sub> ], [BO <sub>2</sub> (OH)], [BO <sub>4</sub> ]               | [B <sub>5</sub> O <sub>10</sub> (OH)]               | <sup>2</sup> [B <sub>5</sub> O <sub>8</sub> (OH)] <sub>∞</sub>                |
| 28  | 252381    | CaB <sub>3</sub> O <sub>5</sub> (OH)                                              | 0.667             | [BO <sub>3</sub> ], [BO <sub>4</sub> ], [BO <sub>3</sub> (OH)]               | [B <sub>3</sub> O <sub>9</sub> (OH)]                | <sup>2</sup> [B <sub>3</sub> O <sub>5</sub> (OH)] <sub>∞</sub>                |
| 29  | 425207    | Li <sub>3</sub> (B <sub>8</sub> O <sub>12</sub> (OH) <sub>3</sub> )               | 0.75              | [BO <sub>2</sub> (OH)], [BO <sub>4</sub> ]                                   | [B <sub>8</sub> O <sub>18</sub> (OH) <sub>3</sub> ] | <sup>2</sup> [B <sub>8</sub> O <sub>12</sub> (OH) <sub>3</sub> ] <sub>∞</sub> |

**Table S5** The basic information of hydroxyborates with 3D anionic frameworks.

| No. | ICSD code | Compounds                                                                                          | (A+OH)/B<br>ratio | Anionic units                                                                                                                 | FBB units                                   | Anionic<br>framework                                         |
|-----|-----------|----------------------------------------------------------------------------------------------------|-------------------|-------------------------------------------------------------------------------------------------------------------------------|---------------------------------------------|--------------------------------------------------------------|
| 1   | 76888     | $\text{Ca}_9\text{B}_{26}\text{O}_{34}(\text{OH})_{24}\text{Cl}_4$<br>$\cdot 13\text{H}_2\text{O}$ | 1.269             | $[\text{BO}_3]$ , $[\text{BO}_2(\text{OH})]$ , $[\text{BO}_4]$ ,<br>$[\text{BO}_2(\text{OH})_2]$ , $[\text{BO}_3(\text{OH})]$ | $[\text{B}_{26}\text{O}_{47}(\text{OH})_2]$ | $^3[\text{B}_{26}\text{O}_{34}(\text{OH})_{24}]$<br>$\infty$ |
| 2   | 20155     | $\text{Li}_3(\text{B}_5\text{O}_8(\text{OH})_2)$                                                   | 1                 | $[\text{BO}_3]$ , $[\text{BO}_4]$ , $[\text{BO}_3(\text{OH})]$                                                                | $[\text{B}_5\text{O}_{10}(\text{OH})_2]$    | $^3[\text{B}_5\text{O}_8(\text{OH})_2]_\infty$               |
| 3   | 20173     | $\text{Li}_3(\text{B}_5\text{O}_8(\text{OH})_2)$                                                   | 1                 | $[\text{BO}_3]$ , $[\text{BO}_4]$ , $[\text{BO}_3(\text{OH})]$                                                                | $[\text{B}_5\text{O}_{10}(\text{OH})_2]$    | $^3[\text{B}_5\text{O}_8(\text{OH})_2]_\infty$               |
| 4   | 418166    | $\text{Li}_3(\text{B}_5\text{O}_8(\text{OH})_2)$                                                   | 1                 | $[\text{BO}_3]$ , $[\text{BO}_4]$ , $[\text{BO}_3(\text{OH})]$                                                                | $[\text{B}_5\text{O}_{10}(\text{OH})_2]$    | $^3[\text{B}_5\text{O}_8(\text{OH})_2]_\infty$               |
| 5   | 421260    | $\text{Y}(\text{B}_2\text{O}_3(\text{OH}))_3$                                                      | 0.667             | $[\text{BO}_3]$ , $[\text{BO}_3(\text{OH})]$                                                                                  | $[\text{B}_2\text{O}_5(\text{OH})]$         | $^3[\text{B}_2\text{O}_3(\text{OH})]_\infty$                 |

**Table S6** The ICSD collection numbers, chemical formula, space group, GGA and HSE06 band gaps, second harmonic generation (SHG) coefficients, and birefringence  $\Delta n$  at 1064 nm of 60 screening hydroxyborates crystals. Note that SHG coefficients, and birefringence  $\Delta n$  have been corrected with scissors operators.

| No. | ICSD code | Compounds                                                                                     | Space group | Band gap (eV) |       | SHG coefficients (pm/V)                                                                                 | $\Delta n$ at 1064 nm |
|-----|-----------|-----------------------------------------------------------------------------------------------|-------------|---------------|-------|---------------------------------------------------------------------------------------------------------|-----------------------|
|     |           |                                                                                               |             | GGA           | HSE06 |                                                                                                         |                       |
| 1   | 39637     | $\text{KCa}_4(\text{B}_{22}\text{O}_{32})(\text{OH})_{10}\text{Cl}\cdot 4\text{H}_2\text{O}$  | $P1$        | 5.49          | 7.02  | $d_{11} = 0.54, d_{12} = -0.57$<br>$d_{16} = 0.48, d_{22} = -0.56$                                      | 0.064                 |
| 2   | 187776    | $\text{KCa}_4(\text{B}_{22}\text{O}_{32})(\text{OH})_{10}\text{Cl}\cdot 4\text{H}_2\text{O}$  | $P1$        | 5.48          | 7.08  | $d_{11} = -0.55, d_{12} = 0.59$<br>$d_{16} = 0.50, d_{22} = -0.55$                                      | 0.065                 |
| 3   | 172480    | $\text{Bi}(\text{B}_4\text{O}_6(\text{OH})_2)(\text{OH})$                                     | $P1$        | 4.69          | 5.59  | 0                                                                                                       | 0.110                 |
| 4   | 76888     | $\text{Ca}_9\text{B}_{26}\text{O}_{34}(\text{OH})_{24}\text{Cl}_4\cdot 13\text{H}_2\text{O}$  | $P1$        | 5.36          | 6.65  | $d_{23} = 0.12, d_{24} = -0.41, d_{33}$<br>$= 0.09$<br>$d_{11} = -0.59, d_{12} = 0.67,$                 | 0.031                 |
| 5   | 420549    | $\text{Ca}_2(\text{B}_5\text{O}_8(\text{OH}))_2\text{B}(\text{OH})_3\cdot \text{H}_2\text{O}$ | $P1$        | 5.52          | 7.08  | $d_{13} = 0.12, d_{14} = -0.14,$<br>$d_{16} = -0.56, d_{22} = 0.51,$<br>$d_{24} = -0.17, d_{33} = 0.10$ | 0.060                 |
| 6   | 134988    | $\text{Ca}_2(\text{B}_5\text{O}_8(\text{OH}))_2\text{B}(\text{OH})_3\cdot \text{H}_2\text{O}$ | $P1$        | 5.90          | 7.38  | $d_{11} = 0.66, d_{12} = -0.67,$<br>$d_{16} = 0.60, d_{22} = -0.55$                                     | 0.071                 |
| 7   | 42570     | $\text{Ba}_2\text{B}_{13}\text{O}_{19}(\text{OH})_5\cdot 5\text{H}_2\text{O}$                 | $P1$        | 5.15          | 6.58  | $d_{16} = -0.29, d_{22} = -0.49,$<br>$d_{23} = 0.65$                                                    | 0.035                 |
| 8   | 28426     | $\text{CaB}_3\text{O}_4(\text{OH})_3\cdot \text{H}_2\text{O}$                                 | $P2_1$      | 5.59          | 7.28  | $d_{11} = 0.13$                                                                                         | 0.011                 |
| 9   | 28427     | $\text{Ca}(\text{B}_3\text{O}_4(\text{OH})_3)\cdot \text{H}_2\text{O}$                        | $P2_1$      | 5.67          | 7.20  | $d_{22} = 0.15, d_{23} = -0.05$                                                                         | 0.028                 |
| 10  | 171019    | $\text{CaB}_8\text{O}_{11}(\text{OH})_4$                                                      | $P2_1$      | 5.56          | 6.71  | $d_{22} = 0.65, d_{23} = -0.66$                                                                         | 0.091                 |
| 11  | 250323    | $\text{CaB}_8\text{O}_{11}(\text{OH})_4$                                                      | $P2_1$      | 5.59          | 6.81  | $d_{14} = -0.07, d_{16} = 0.10,$<br>$d_{22} = 0.62, d_{23} = -0.64$                                     | 0.061                 |
| 12  | 262502    | $\text{Ba}_2(\text{B}_6\text{O}_9(\text{OH})_4)$                                              | $P2_1$      | 5.22          | 7.14  | $d_{16} = -0.43, d_{22} = 1.07$                                                                         | 0.037                 |
| 13  | 415082    | $\text{Ca}(\text{B}_8\text{O}_{11}(\text{OH})_4)$                                             | $P2_1$      | 5.58          | 6.80  | $d_{14} = -0.07, d_{16} = 0.12,$<br>$d_{22} = 0.63, d_{23} = -0.64$                                     | 0.091                 |
| 14  | 432814    | $\text{Ca}_2(\text{B}_5\text{O}_8(\text{OH}))_2\text{B}(\text{OH})_3\cdot \text{H}_2\text{O}$ | $P2_1$      | 5.89          | 7.54  | $d_{16} = -0.06, d_{22} = 0.13,$<br>$d_{23} = -0.08$                                                    | 0.076                 |
| 15  | 4228      | $\text{Sr}(\text{B}_8\text{O}_{11}(\text{OH})_4)$                                             | $P2_1$      | 5.06          | 6.45  | $d_{16} = -0.88, d_{22} = 0.57,$<br>$d_{23} = 0.47$                                                     | 0.076                 |
| 16  | 20074     | $\text{Sr}_2(\text{B}_5\text{O}_8(\text{OH}))_2\text{B}(\text{OH})_3\cdot \text{H}_2\text{O}$ | $P2_1$      | 5.85          | 7.36  | $d_{22} = 0.08, d_{23} = -0.07$                                                                         | 0.040                 |
| 17  | 28014     | $\text{Sr}_2(\text{B}_5\text{O}_8(\text{OH}))_2\text{B}(\text{OH})_3\cdot \text{H}_2\text{O}$ | $P2_1$      | 5.35          | 6.77  | $d_{22} = 0.21, d_{23} = -0.03$                                                                         | 0.050                 |
| 18  | 100400    | $(\text{NH}_4)_2(\text{B}_4\text{O}_5(\text{OH})_4)\cdot 2\text{H}_2\text{O}$                 | $P2_1$      | 4.97          | 6.30  | $d_{14} = 0.18, d_{16} = 0.32,$<br>$d_{22} = -0.62, d_{23} = 0.25$                                      | 0.014                 |
| 19  | 49364     | $(\text{NH}_4)_2\text{B}_4\text{O}_5(\text{OH})_4\cdot 2\text{H}_2\text{O}$                   | $P2_1$      | 5.18          | 6.68  | $d_{14} = -0.20, d_{16} = -0.37,$<br>$d_{22} = 0.80, d_{23} = -0.42$                                    | 0.016                 |
| 20  | 49365     | $(\text{NH}_4)_2\text{B}_4\text{O}_5(\text{OH})_4\cdot 2\text{H}_2\text{O}$                   | $P2_1$      | 5.17          | 6.47  | $d_{14} = -0.10, d_{16} = -0.24,$<br>$d_{22} = 0.55, d_{23} = -0.28$                                    | 0.041                 |
| 21  | 19922     | $\text{Ba}_2(\text{B}_5\text{O}_8(\text{OH}))_2\text{B}(\text{OH})_3\cdot \text{H}_2\text{O}$ | $P2_1$      | 5.83          | 6.76  | $d_{16} = -0.07, d_{22} = -0.16,$<br>$d_{23} = 0.10$                                                    | 0.070                 |
| 22  | 141235    | $\text{NaRb}_3\text{B}_6\text{O}_9(\text{OH})_3(\text{HCO}_3)$                                | $P2_1$      | 4.19          | 5.40  | $d_{14} = 0.08, d_{16} = 0.06,$<br>$d_{22} = 0.11, d_{23} = 0.16$                                       | 0.017                 |

| No. | ICSD code | Compounds                                                                                            | Space group                                     | Band gap (eV) |       | SHG coefficients (pm/V)                                                                                 | $\Delta n$ at 1064 nm |
|-----|-----------|------------------------------------------------------------------------------------------------------|-------------------------------------------------|---------------|-------|---------------------------------------------------------------------------------------------------------|-----------------------|
|     |           |                                                                                                      |                                                 | GGA           | HSE06 |                                                                                                         |                       |
| 23  | 95447     | $\text{Na}_2\text{Ba}_2(\text{B}_{10}\text{O}_{17}(\text{OH})_2)$                                    | <i>C2</i>                                       | 4.70          | 6.12  | $d_{16} = 0.38, d_{22} = -1.08$                                                                         | 0.027                 |
| 24  | 403149    | $\text{Ba}_3(\text{B}_{10}\text{O}_{17}(\text{OH})_2)$                                               | <i>C2</i>                                       | 4.62          | 5.95  | $d_{22} = 0.33, d_{23} = -0.18$                                                                         | 0.033                 |
| 25  | 262542    | $\text{Ba}_3\text{B}_6\text{O}_{11}(\text{OH})_2$                                                    | <i>Pc</i>                                       | 4.76          | 6.12  | $d_{11} = -0.67, d_{33} = 0.33$                                                                         | 0.010                 |
| 26  | 154523    | $\text{Na}_4(\text{B}_{10}\text{O}_{16}(\text{OH})_2) \cdot 4\text{H}_2\text{O}$                     | <i>Pc</i>                                       | 4.79          | 6.42  | $d_{11} = 0.65, d_{12} = -0.25,$<br>$d_{13} = -0.38, d_{15} = -0.08,$<br>$d_{33} = 0.21$                | 0.030                 |
| 27  | 26380     | $\text{NH}_4(\text{B}_5\text{O}_6(\text{OH})_4) \cdot 2\text{H}_2\text{O}$                           | <i>Pc</i>                                       | 4.98          | 6.47  | $d_{11} = 0.29, d_{12} = -0.39,$<br>$d_{13} = 0.06, d_{15} = 0.10,$<br>$d_{33} = 0.07$                  | 0.050                 |
| 28  | 2942      | $\text{Sr}_2(\text{B}_5\text{O}_8(\text{OH}))_2(\text{B}(\text{OH})_3) \cdot \text{H}_2\text{O}$     | <i>Cc</i>                                       | 5.91          | 7.49  | $d_{11} = 0.07, d_{13} = 0.06,$<br>$d_{24} = -0.08, d_{33} = 0.12$                                      | 0.005                 |
| 29  | 260879    | $\text{Na}_3(\text{B}_3\text{O}_4(\text{OH})_4)$                                                     | <i>Cc</i>                                       | 4.64          | 5.92  | $d_{15} = 0.26, d_{24} = -0.34$                                                                         | 0.037                 |
| 30  | 262913    | $\text{La}(\text{B}_4\text{O}_6(\text{OH})_2\text{Cl})$                                              | <i>Cc</i>                                       | 6.17          | 7.14  | $d_{11} = -0.79, d_{12} = 0.77,$<br>$d_{13} = 0.34, d_{15} = -0.38,$<br>$d_{24} = -0.39, d_{33} = 0.93$ | 0.030                 |
| 31  | 124040    | $\text{Ba}_2\text{B}_{10}\text{O}_{16}(\text{OH})_2(\text{H}_3\text{BO}_3) \cdot \text{H}_2\text{O}$ | <i>Cc</i>                                       | 5.48          | 7.29  | $d_{24} = 0.10, d_{33} = -0.11$                                                                         | 0.069                 |
| 32  | 34648     | $\text{K}_2(\text{B}_4\text{O}_5(\text{OH})_4) \cdot 2\text{H}_2\text{O}$                            | <i>P2<sub>1</sub>2<sub>1</sub>2<sub>1</sub></i> | 5.12          | 6.67  | $d_{14} = -0.13$                                                                                        | 0.008                 |
| 33  | 57297     | $\text{Ba}(\text{BO}_2(\text{OH}))$                                                                  | <i>P2<sub>1</sub>2<sub>1</sub>2<sub>1</sub></i> | 4.10          | 5.88  | $d_{14} = 0.07$                                                                                         | 0.082                 |
| 34  | 13423     | $\text{Li}_2\text{CsB}_7\text{O}_{10}(\text{OH})_4$                                                  | <i>C222</i>                                     | 5.20          | 7.26  | $d_{14} = 0.70$                                                                                         | 0.023                 |
| 35  | 431106    | $\text{Na}(\text{B}_5\text{O}_7(\text{OH})_2) \cdot \text{H}_2\text{O}$                              | <i>Pca2<sub>1</sub></i>                         | 5.79          | 7.29  | $d_{24} = -0.14, d_{33} = -0.09$                                                                        | 0.059                 |
| 36  | 250215    | $\text{CaLi}_4(\text{B}_5\text{O}_8(\text{OH})_2)_2$                                                 | <i>Pnc2</i>                                     | 5.08          | 6.75  | $d_{24} = -0.11, d_{33} = 0.29$                                                                         | 0.033                 |
| 37  | 36431     | $\text{Li}_3(\text{B}_5\text{O}_8(\text{OH})_2)$                                                     | <i>Pnc2</i>                                     | 5.60          | 6.26  | $d_{24} = -0.05$                                                                                        | 0.037                 |
| 38  | 22192     | $\text{CaB}_3\text{O}_5(\text{OH})$                                                                  | <i>Pna2<sub>1</sub></i>                         | 5.50          | 6.36  | $d_{15} = -0.65, d_{24} = 0.48,$<br>$d_{33} = 0.82$                                                     | 0.043                 |
| 39  | 23880     | $\text{CaB}_3\text{O}_5(\text{OH})$                                                                  | <i>Pna2<sub>1</sub></i>                         | 5.50          | 6.96  | $d_{15} = 0.41, d_{24} = -0.57,$<br>$d_{33} = 0.72$                                                     | 0.040                 |
| 40  | 1973      | $(\text{Na}(\text{H}_2\text{O}))_2(\text{B}_5\text{O}_8(\text{OH}))$                                 | <i>Pna2<sub>1</sub></i>                         | 5.00          | 6.47  | $d_{15} = 0.34, d_{24} = 0.33,$<br>$d_{33} = -0.68$                                                     | 0.023                 |
| 41  | 249876    | $\text{Na}_2\text{B}_5\text{O}_8(\text{OH}) \cdot 2\text{H}_2\text{O}$                               | <i>Pna2<sub>1</sub></i>                         | 5.00          | 6.62  | $d_{15} = -0.35, d_{24} = -0.34,$<br>$d_{33} = 0.70$                                                    | 0.023                 |
| 42  | 252381    | $\text{CaB}_3\text{O}_5(\text{OH})$                                                                  | <i>Pna2<sub>1</sub></i>                         | 5.74          | 7.15  | $d_{15} = -0.50, d_{24} = 0.70,$<br>$d_{33} = -0.77$                                                    | 0.037                 |
| 43  | 253012    | $\text{K}_3\text{B}_3\text{O}_4(\text{OH})_4 \cdot 2\text{H}_2\text{O}$                              | <i>Cmc2<sub>1</sub></i>                         | 4.45          | 5.77  | $d_{15} = 0.01, d_{24} = -0.39,$<br>$d_{33} = 0.33$                                                     | 0.036                 |
| 44  | 113334    | $(\text{NH}_4)_2(\text{B}_4\text{O}_5(\text{OH})_4) \cdot 2\text{H}_2\text{O}$                       | <i>Cmc2<sub>1</sub></i>                         | 5.19          | 6.71  | $d_{15} = 0.61, d_{24} = -0.20,$<br>$d_{33} = -0.50$                                                    | 0.016                 |
| 45  | 6292      | $\text{K}(\text{B}_5\text{O}_6(\text{OH})_4) \cdot 2\text{H}_2\text{O}$                              | <i>Aba2</i>                                     | 5.57          | 7.02  | $d_{15} = 0.116, d_{24} = -0.085,$<br>$d_{33} = 0.082$                                                  | 0.050                 |
| 46  | 29406     | $\text{RbB}_5\text{O}_6(\text{OH})_4 \cdot 2\text{H}_2\text{O}$                                      | <i>Aba2</i>                                     | 5.50          | 7.22  | $d_{15} = 0.08, d_{24} = -0.08,$<br>$d_{33} = 0.07$                                                     | 0.050                 |
| 47  | 90001     | $(\text{NH}_4)(\text{B}_5\text{O}_6(\text{OH})_4) \cdot 2\text{H}_2\text{O}$                         | <i>Aba2</i>                                     | 5.58          | 6.91  | $d_{15} = -0.18, d_{24} = 0.15,$<br>$d_{33} = 0.26$                                                     | 0.049                 |

| No. | ICSD code | Compounds                                                                    | Space group                    | Band gap (eV) |       | SHG coefficients (pm/V)                                            | $\Delta n$ at 1064 nm |
|-----|-----------|------------------------------------------------------------------------------|--------------------------------|---------------|-------|--------------------------------------------------------------------|-----------------------|
|     |           |                                                                              |                                | GGA           | HSE06 |                                                                    |                       |
| 48  | 410811    | $(\text{NH}_4)(\text{B}_5\text{O}_6(\text{OH})_4) \cdot 2\text{H}_2\text{O}$ | <i>Aba2</i>                    | 5.59          | 6.88  | $d_{15} = -0.17, d_{24} = 0.13,$<br>$d_{33} = 0.26$                | 0.049                 |
| 49  | 4481      | $\text{K}_3\text{B}_5\text{O}_8(\text{OH})_2$                                | <i>Fdd2</i>                    | 4.84          | 6.26  | $d_{15} = 0.21, d_{24} = 0.26$                                     | 0.042                 |
| 50  | 20662     | $\text{Mg}(\text{B}_2\text{O}(\text{OH})_6)$                                 | <i>P4<sub>2</sub></i>          | 5.44          | 7.15  | 0                                                                  | 0.004                 |
| 51  | 24920     | $\text{Mg}(\text{B}_2\text{O}(\text{OH})_6)$                                 | <i>P4<sub>2</sub></i>          | 4.30          | 5.86  | $d_{33} = -0.39$                                                   | 0.002                 |
| 52  | 20155     | $\text{Li}_3(\text{B}_5\text{O}_8(\text{OH})_2)$                             | <i>P4<sub>12,2</sub></i>       | 6.37          | 7.82  | 0                                                                  | 0.004                 |
| 53  | 20173     | $\text{Li}_3(\text{B}_5\text{O}_8(\text{OH})_2)$                             | <i>P4<sub>12,2</sub></i>       | 5.97          | 7.53  | 0                                                                  | 0.004                 |
| 54  | 418166    | $\text{Li}_3(\text{B}_5\text{O}_8(\text{OH})_2)$                             | <i>P4<sub>32,2</sub></i>       | 5.96          | 7.81  | 0                                                                  | 0.004                 |
| 55  | 431536    | $\text{Ba}_2(\text{B}_4\text{O}_7(\text{OH})_2)$                             | <i>P3<sub>121</sub></i>        | 4.13          | 5.15  | $d_{11} = 0.57, d_{12} = -0.57$                                    | 0.014                 |
| 56  | 10266     | $\text{Na}_2(\text{B}_4\text{O}_5(\text{OH})_4) \cdot 3\text{H}_2\text{O}$   | <i>R32</i>                     | 5.23          | 6.60  | $d_{11} = 0.10, d_{12} = -0.10$                                    | 0.007                 |
| 57  | 70998     | $\text{NaRb}_6(\text{B}_4\text{O}_5(\text{OH})_4)_3(\text{BO}_2)$            | <i>R32</i>                     | 4.75          | 5.83  | $d_{11} = 0.02, d_{12} = -0.02$                                    | 0.010                 |
| 58  | 70999     | $\text{NaRb}_6(\text{B}_4\text{O}_5(\text{OH})_4)_3(\text{BO}_2)$            | <i>R32</i>                     | 4.73          | 5.82  | $d_{11} = 0.09, d_{12} = -0.09$                                    | 0.010                 |
| 59  | 421260    | $\text{Y}(\text{B}_2\text{O}_3(\text{OH}))_3$                                | <i>R3c</i>                     | 6.25          | 7.60  | $d_{21} = -0.78, d_{22} = 0.78,$<br>$d_{15} = 0.20, d_{24} = 0.20$ | 0.037                 |
| 60  | 425207    | $\text{Li}_3(\text{B}_8\text{O}_{12}(\text{OH})_3)$                          | <i>P<math>\bar{6}</math>2c</i> | 5.72          | 6.84  | $d_{16} = 0.20, d_{22} = -0.20$                                    | 0.036                 |

**Table S7** Calculated band gaps ( $E_g$ ) by hybrid HSE06, the maximum SHG coefficients ( $d_{ij}$ ), birefringence at 1064 nm ( $\Delta n$ ), UV cutoff wavelengths ( $\lambda_{\text{cutoff}}$ ), shortest phase-matching wavelengths ( $\lambda_{\text{PM}}$ ), dimensionality of B–O/OH anionic framework, and ( $A + \text{OH}$ )/B ratio of screened hydroxyborate crystals.

| No.             | ICSD code | Compounds                                                                      | Space group | $E_g$ (eV)   | $d_{ij}$ (pm/V)                                                 | $\Delta n$ | $\lambda_{\text{cutoff}}$ (nm) | $\lambda_{\text{PM}}$ (nm) | Dimension / Ration |
|-----------------|-----------|--------------------------------------------------------------------------------|-------------|--------------|-----------------------------------------------------------------|------------|--------------------------------|----------------------------|--------------------|
| 1               | 42570     | $\text{Ba}_2\text{B}_{13}\text{O}_{19}(\text{OH})_5 \cdot 5\text{H}_2\text{O}$ | $P1$        | 6.58         | $d_{23} = 0.65$                                                 | 0.04       | 189                            | 298                        | 2/0.539            |
| 1a <sup>1</sup> |           |                                                                                | $P1$        | > 6.2        | $d_{\langle\text{powder}\rangle} \approx 1.0 \times \text{KDP}$ | ---        | <200                           | ---                        |                    |
| 1b <sup>1</sup> |           |                                                                                | $P1$        | 5.41<br>GGA  | $d_{23} = 0.87$                                                 | 0.042      | 230                            | 270                        |                    |
| 2               | 171019    | $\text{CaB}_8\text{O}_{11}(\text{OH})_4$                                       | $P2_1$      | 6.71         | $d_{23} = -0.66$                                                | 0.091      | 185                            | 199                        | 2/0.625            |
| 2a <sup>2</sup> |           |                                                                                | $P2_1$      | > 6.3        | $d_{\langle\text{powder}\rangle} \approx 1.4 \times \text{KDP}$ | ---        | <200                           | ---                        |                    |
| 2b <sup>2</sup> |           |                                                                                | $P2_1$      | 7.43<br>PBE0 | $d_{23} = -0.41$                                                | 0.093      | 165                            | 174                        |                    |
| 3               | 4228      | $\text{Sr}(\text{B}_8\text{O}_{11}(\text{OH})_4)$                              | $P2_1$      | 6.45         | $d_{16} = -0.88$                                                | 0.076      | 193                            | 211                        | 2/0.625            |
| 3a <sup>2</sup> |           |                                                                                | $P2_1$      | >6.30        | $d_{\langle\text{powder}\rangle} \approx 1.4 \times \text{KDP}$ | 0.109      | <200                           | ---                        |                    |
| 3b <sup>2</sup> |           |                                                                                | $P2_1$      | 7.02<br>PBE0 | $d_{16} = 0.39$                                                 | 0.087      | 176                            | 185                        |                    |
| 4               | 13423     | $\text{Li}_2\text{CsB}_7\text{O}_{10}(\text{OH})_4$                            | $C222$      | 7.26         | $d_{14} = 0.70$                                                 | 0.023      | 171                            | 321                        | 2/1                |
| 4a <sup>3</sup> |           |                                                                                | $C222$      | 6.35         | $d_{\langle\text{powder}\rangle} \approx 2.5 \times \text{KDP}$ | ---        | 196                            | ---                        |                    |
| 4b <sup>3</sup> |           |                                                                                | $C222$      | 4.56<br>GGA  | $d_{14} = -0.76$                                                | ---        | 273                            | ---                        |                    |
| 5               | 249876    | $\text{Na}_2\text{B}_5\text{O}_8(\text{OH}) \cdot 2\text{H}_2\text{O}$         | $Pna2_1$    | 6.62         | $d_{33} = 0.70$                                                 | 0.023      | 188                            | 348                        | 2/0.6              |
| 5a <sup>4</sup> |           |                                                                                | $Pna2_1$    | > 6.5        | $d_{\langle\text{powder}\rangle} \approx 0.5 \times \text{KDP}$ | ---        | <190                           | ---                        |                    |
| 6               | 253012    | $\text{K}_3\text{B}_3\text{O}_4(\text{OH})_4 \cdot 2\text{H}_2\text{O}$        | $Cmc2_1$    | 5.77         | $d_{24} = -0.39$                                                | 0.036      | 216                            | 295                        | 0/2.333            |
| 6a <sup>5</sup> |           |                                                                                | $Cmc2_1$    | 6.1          | $d_{\langle\text{powder}\rangle} \approx 0.8 \times \text{KDP}$ | ---        | 204                            | ---                        |                    |
| 6b <sup>5</sup> |           |                                                                                | $Cmc2_1$    | 4.8<br>GGA   | $d_{24} = 0.37$                                                 | ---        | 256                            | ---                        |                    |

<sup>a</sup> Experimentally measured data in references. <sup>b</sup> Theoretically calculated data in references.



**Table S8** Predicted band gaps ( $E_g$ ) by hybrid HSE06, largest SHG coefficients ( $d_{ij}$ ), birefringence at 1064 nm ( $\Delta n$ ), UV cutoff wavelengths ( $\lambda_{\text{cutoff}}$ ), shortest phase-matching wavelengths ( $\lambda_{\text{PM}}$ ), dimensionality of B–O/OH anionic framework, and ( $A + \text{OH}$ )/B ratio of screened hydroxyborate crystals.

| No.             | ICSD code | Compounds                                                                                     | Space group | $E_g$ (eV) | $d_{ij}$ (pm/V)                                                 | $\Delta n$ | $\lambda_{\text{cutoff}}$ (nm) | $\lambda_{\text{PM}}$ (nm) | Dimension / Ration |
|-----------------|-----------|-----------------------------------------------------------------------------------------------|-------------|------------|-----------------------------------------------------------------|------------|--------------------------------|----------------------------|--------------------|
| 1               | 187776    | $\text{KCa}_4(\text{B}_{22}\text{O}_{32})(\text{OH})_{10}\text{Cl}\cdot 4\text{H}_2\text{O}$  | $P1$        | 7.08       | $d_{12} = 0.59$                                                 | 0.065      | 176                            | 235                        | 2/0.682            |
| 2               | 76888     | $\text{Ca}_9\text{B}_{26}\text{O}_{34}(\text{OH})_{24}\text{Cl}_4\cdot 13\text{H}_2\text{O}$  | $P1$        | 6.65       | $d_{24} = -0.41$                                                | 0.031      | 187                            | 336                        | 3/1.269            |
| 3               | 95447     | $\text{Na}_2\text{Ba}_2(\text{B}_{10}\text{O}_{17}(\text{OH})_2)$                             | $C2$        | 6.12       | $d_{22} = -1.08$                                                | 0.027      | 203                            | 368                        | 2/0.6              |
| 4               | 154523    | $\text{Na}_4(\text{B}_{10}\text{O}_{16}(\text{OH})_2)\cdot 4\text{H}_2\text{O}$               | $Pc$        | 6.42       | $d_{11} = 0.65$                                                 | 0.03       | 194                            | 318                        | 2/0.6              |
| 5               | 1973      | $(\text{Na}(\text{H}_2\text{O}))_2(\text{B}_5\text{O}_8(\text{OH}))$                          | $Pna2_1$    | 6.47       | $d_{33} = -0.68$                                                | 0.023      | 192                            | 346                        | 2/0.6              |
| 6               | 134988    | $\text{Ca}_2(\text{B}_5\text{O}_8(\text{OH}))_2\text{B}(\text{OH})_3\cdot \text{H}_2\text{O}$ | $P1$        | 7.38       | $d_{12} = -0.67$                                                | 0.071      | 170                            | 229                        | 2/0.636            |
| 6a <sup>6</sup> |           |                                                                                               | $P1$        | >5.75      | $d_{\langle\text{powder}\rangle} \approx 1.8 \times \text{KDP}$ | ---        | <216                           | ---                        |                    |
| 7               | 262502    | $\text{Ba}_2(\text{B}_6\text{O}_9(\text{OH})_4)$                                              | $P2_1$      | 7.14       | $d_{22} = 1.07$                                                 | 0.037      | 174                            | 302                        | 2/1                |
| 7a <sup>7</sup> |           |                                                                                               | $P2_1$      | >6.5       | $d_{\langle\text{powder}\rangle} \approx 3 \times \text{KDP}$   | ---        | <190                           | ---                        |                    |
| 8               | 26380     | $\text{NH}_4(\text{B}_5\text{O}_6(\text{OH})_4)\cdot 2\text{H}_2\text{O}$                     | $Pc$        | 6.47       | $d_{12} = -0.39$                                                | 0.05       | 192                            | 240                        | 0/1                |
| 8a <sup>8</sup> |           |                                                                                               | $Pc$        | 6.91       | ---                                                             | 0.058      | $\approx 180$                  | ---                        |                    |
| 9               | 252381    | $\text{CaB}_3\text{O}_5(\text{OH})$                                                           | $Pna2_1$    | 7.15       | $d_{33} = -0.77$                                                | 0.037      | 174                            | 327                        | 2/0.667            |
| 9a <sup>9</sup> |           |                                                                                               | $Pna2_1$    | ---        | $d_{\langle\text{powder}\rangle} \approx 1 \times \text{KDP}$   | ---        | ---                            | ---                        |                    |

<sup>a</sup> Experimentally measured data in references.

**Table S9** The investigation of ratio  $(A + OH)/B = 0.636$ , dimensionality of B–O/OH anionic framework, birefringence at 1064 nm (cal.), and  $[BO_3]$  &  $[B(OH)_3]$  &  $[BO_2(OH)]$  density among hydroxyborates involving the screened compounds.

| No. | ICSD code | Compounds                                       | Space group            | Dimension | Number of $[BO_3]$ & $[B(OH)_3]$ & $[BO_2(OH)]$ in cell | Cell volume ( $\text{\AA}^3$ ) | Birefringence at 1064 nm (cal.) | Density of $[BO_3]$ & $[B(OH)_3]$ & $[BO_2(OH)]$ groups( $\text{\AA}^{-3}$ ) |
|-----|-----------|-------------------------------------------------|------------------------|-----------|---------------------------------------------------------|--------------------------------|---------------------------------|------------------------------------------------------------------------------|
| 1   | 420549    | $Ca_2(B_5O_8(OH))_2B(OH)_3 \cdot H_2O-I$        | <i>P1</i>              | 2D        | 6.5                                                     | 386.3                          | 0.06                            | 0.0168                                                                       |
| 2   | 134988    | $Ca_2(B_5O_8(OH))_2(B(OH)_3) \cdot H_2O-II$     | <i>P1</i>              | 2D        | 7                                                       | 385.7                          | 0.071                           | 0.0181                                                                       |
| 3   | 432814    | $Ca_2(B_5O_8(OH))_2(B(OH)_3) \cdot H_2O-III$    | <i>P2</i> <sub>1</sub> | 2D        | 14                                                      | 773.2                          | 0.076                           | 0.0181                                                                       |
| 4   | 20074     | $Sr_2(B_5O_8(OH))_2(B(OH)_3) \cdot H_2O-I$      | <i>P2</i> <sub>1</sub> | 2D        | 13                                                      | 802.5                          | 0.040                           | 0.0162                                                                       |
| 5   | 28014     | $Sr_2(B_5O_8(OH))_2(B(OH)_3) \cdot H_2O-II$     | <i>P2</i> <sub>1</sub> | 2D        | 13                                                      | 802.5                          | 0.050                           | 0.0162                                                                       |
| 6   | 2942      | $Sr_2(B_5O_8(OH))_2(B(OH)_3) \cdot H_2O-III$    | <i>Cc</i>              | 2D        | 18                                                      | 1627.7                         | 0.005                           | 0.0111                                                                       |
| 7   | 19922     | $Ba_2(B_5O_8(OH))_2(B(OH)_3) \cdot H_2O-I$      | <i>P2</i> <sub>1</sub> | 2D        | 14                                                      | 857.1                          | 0.070                           | 0.0163                                                                       |
| 8   | 124040    | $Ba_2B_{10}O_{16}(OH)_2(H_3BO_3) \cdot H_2O-II$ | <i>Cc</i>              | 2D        | 30                                                      | 1717.0                         | 0.069                           | 0.0174                                                                       |

**Table S10** Bonding electron difference ( $\Delta\rho$ ) and contribution percent  $w$  (%) of different units in  $\text{KCa}_4(\text{B}_{22}\text{O}_{32}(\text{OH})_{10}\text{Cl})\cdot 4\text{H}_2\text{O}$  calculated by the REDA model.

| <b>Compounds</b>                                                                             | <b>units</b>               | $\Delta\rho$ | $w$ (%) |
|----------------------------------------------------------------------------------------------|----------------------------|--------------|---------|
| $\text{KCa}_4(\text{B}_{22}\text{O}_{32}(\text{OH})_{10}\text{Cl})\cdot 4\text{H}_2\text{O}$ | $[\text{BO}_3]$            | 0.0106       | 52.46   |
|                                                                                              | $[\text{BO}_2(\text{OH})]$ | 0.0054       | 26.55   |
|                                                                                              | $[\text{B}(\text{OH})_3]$  | 0.0029       | 14.28   |
|                                                                                              | $[\text{BO}_4]$            | 0.0008       | 4.04    |
|                                                                                              | $[\text{KO}_4]$            | 0.0001       | 0.73    |
|                                                                                              | $[\text{CaO}_9]$           | 0.0003       | 1.45    |
|                                                                                              | $[\text{CaO}_8\text{Cl}]$  | 0.0001       | 0.49    |

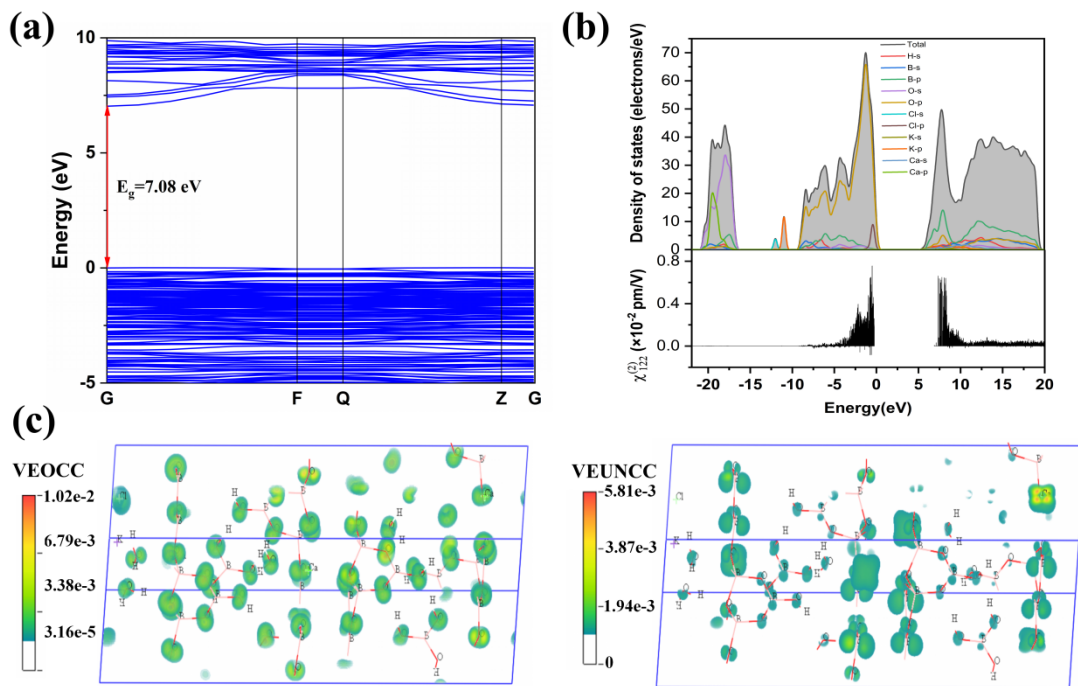

**Figure S1.** (a) Band structures by the HSE06 functional. (b) Total and partial density of states (PDOS) and band-resolved NLO coefficients. (c) SHG-weighted density of occupied and unoccupied states in virtual-electron (VE) progress of  $\text{KCa}_4(\text{B}_{22}\text{O}_{32}(\text{OH})_{10}\text{Cl}) \cdot 4\text{H}_2\text{O}$ . Here,  $\chi_{122} = 2d_{12}$ .

## Notes and references

- 1 K. Liu, J. Han, F. Li, C. Jin, Z. Yang, M. Mutailipu and S. Pan,  $\text{Ba}_2\text{B}_{13}\text{O}_{19}(\text{OH})_5 \cdot 5\text{H}_2\text{O}$ : A promising nonlinear optical material with a unique  ${}^2[\text{B}_{13}\text{O}_{19}(\text{OH})_5]_{\infty}$  two-dimensional layer, *J. Alloys Compd.*, 2022, **897**, 163194.
- 2 P. Gong, L. Kang and Z. Lin, Realizing deep-ultraviolet second harmonic generation by first-principles-guided materials exploration in hydroxyborates, *J. Am. Chem. Soc.*, 2020, **142**, 15157–15163.
- 3 J.-H. Huang, C.-C. Jin, P.-L. Xu, P. Gong, Z. Lin, J.-W. Cheng and G.-Y. Yang,  $\text{Li}_2\text{CsB}_7\text{O}_{10}(\text{OH})_4$ : A deep-ultraviolet nonlinear-optical mixed-alkaline borate constructed by unusual heptaborate anions, *Inorg. Chem.*, 2019, **58**, 1755–1758.
- 4 Y. Wang, S. Pan, X. Tian, Z. Zhou, G. Liu, J. Wang and D. Jia, Synthesis, structure, and properties of the noncentrosymmetric hydrated borate  $\text{Na}_2\text{B}_5\text{O}_8(\text{OH}) \cdot 2\text{H}_2\text{O}$ , *Inorg. Chem.*, 2009, **48**, 7800–7804.
- 5 Q. Liu, X. Zhang, Z. Yang, F. Zhang, L. Liu, J. Han, Z. Li and S. Pan,  $\text{K}_3\text{B}_3\text{O}_4(\text{OH})_4 \cdot 2\text{H}_2\text{O}$ : A UV nonlinear optical crystal with isolated  $[\text{B}_3\text{O}_4(\text{OH})_4]^{3-}$  anion groups, *Inorg. Chem.*, 2016, **55**, 8744–8749.
- 6 Q.-M. Qiu, X.-Y. Li, C.-A. Chen, K.-N. Sun and G.-Y. Yang, Polar polymorphism:  $\beta\text{-Ca}_2[\text{B}_5\text{O}_8(\text{OH})]_2[\text{B}(\text{OH})_3] \cdot \text{H}_2\text{O}$ -synthesis, structure and nonlinear optical property, *J. Solid State Chem.*, 2021, **299**, 122193.
- 7 L. Wang, S. Pan, L. Chang, J. Hu and H. Yu, UV nonlinear optical crystal  $\text{Ba}_2[\text{B}_6\text{O}_9(\text{OH})_4]$  featuring unique chiral layers with a new  $\text{B}_{18}\text{O}_{42}$  circle based on  $\text{BO}_3$  and  $\text{BO}_4$  units, *Inorg. Chem.*, 2012, **51**, 1852–1858.
- 8 P. Becker, P. Held and L. Bohatý, Crystal growth and optical properties of the polar hydrated pentaborates  $\text{Rb}[\text{B}_5\text{O}_6(\text{OH})_4] \cdot 2\text{H}_2\text{O}$  and  $\text{NH}_4[\text{B}_5\text{O}_6(\text{OH})_4] \cdot 2\text{H}_2\text{O}$  and structure redetermination of the ammonium compound, *Cryst. Res. Technol.*, 2000, **35**, 1251–1262.
- 9 N. A. Yamnova, S. M. Aksenov, S. Y. Stefanovich, A. S. Volkov and O. V. Dimitrova, Synthesis, crystal structure refinement, and nonlinear-optical properties of  $\text{CaB}_3\text{O}_5(\text{OH})$ : Comparative crystal chemistry of calcium triborates, *Crystallogr. Rep.*, 2015, **60**, 649–655.
